# Supplementary material for: Excess nitrogen as a marker of intense dinitrogen fixation in the Western Tropical South Pacific Ocean: impact on the thermocline waters of the South Pacific
Source: Copernicus journal article supplement (doi:10.5194/bg-2017-557), 2018-01-23
Supplement: Supplementary file [file bg-2017-557-RC2-supplement.pdf]

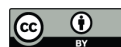

# Excess nitrogen as a marker of intense dinitrogen fixation in the Western Tropical South Pacific Ocean: impact on the thermocline waters of the South Pacific

Alain Fumenia<sup>1</sup>, Thierry Moutin<sup>1</sup>, Sophie Bonnet<sup>2</sup>, Mar Benavides<sup>1,4</sup>, Anne Petrenko<sup>1</sup>, Sandra Helias Nunige<sup>1</sup>, and Christophe Maes<sup>3</sup>

<sup>1</sup>Aix Marseille Univ, Université de Toulon, CNRS, IRD, OSU PYTHEAS, Mediterranean Institute of Oceanography (MIO), UM 110, 13288, Marseille, Cedex 09, France

<sup>2</sup>Aix Marseille Université, CNRS, Université de Toulon, IRD, OSU Pythéas, Mediterranean Institute of Oceanography (MIO), UM 110, 98848, Nouméa, New Caledonia

<sup>3</sup>Laboratoire d'Océanographie Physique et Spatiale, CNRS, Ifremer, IRD, UBO, Brest, France

<sup>4</sup>Marine Biology Section, Department of Biology, University of Copenhagen, 3000 Helsingør, Denmark

Correspondence to: Alain Fumenia ([alain.fumenia@mio.osupytheas.fr](mailto:alain.fumenia@mio.osupytheas.fr))

**Abstract.** As part of the Oligotrophy to UTRa-oligotrophy PACific Experiment cruise, which took place in the Western Tropical South Pacific during the austral summer (March–April 2015), we present data on nitrate, phosphate and on particulate and dissolved organic matter. The stoichiometric nitrogen-to-phosphorus ratios of the inorganic and organic material and the tracer  $N^*$  are described.  $N^*$  allows to trace changes in the proportion of fixed nitrogen due to diazotrophy and/or denitrification. Our results showed that the Melanesian archipelago waters between 160° E and 170° W are characterized by a deficit in nitrate and phosphate in the productive layer, significant dinitrogen fixation rates and an excess of particulate organic nitrogen compared to the canonical ratio of Redfield. A positive  $N^*$  anomaly was observed in the productive layer reflecting the combined effect of phosphate uptake by diazotrophic organisms and remineralization of excess particulate organic nitrogen. The South Pacific Gyre waters between 170° W and 160° W were depleted in nitrate but rich in phosphate. Surface waters exhibited very low dinitrogen fixation rates, an absence of excess particulate organic nitrogen and a  $N^*$  signal close to zero. The higher iron availability coupled with an absence of nitrate in the surface water of the Melanesian archipelago could stimulate the diazotrophic activity, which in turn will introduce excess nitrogen, deplete the surface waters in phosphate and be the explanation for the positive  $N^*$  anomaly in the Melanesian archipelago waters. In the thermocline waters, the  $N^*$  tracer revealed its full complexity, notably the cumulative effect of the remineralization of particulate organic nitrogen and the effects of the mixing of water masses. At the global ocean scale, glottation of  $N^*$  signal from the new Global Ocean Data Analysis Project version 2 database showed a strong spatial decoupling between the thermocline waters of the Eastern Tropical South Pacific and those of the Western Tropical South Pacific. A strongly positive  $N^*$  anomaly was observed in the thermocline waters of the Western Tropical South Pacific in the Coral/Tasman Seas and in the southern part of the subtropical gyre between latitude 23° S and 32° S. A strong negative  $N^*$  signal was observed in the waters of the Eastern Tropical South Pacific between latitude 5° S and 20° S–23° S. We hypothesise that the nitrogen excess observed in the thermocline waters of the Western Tropical South Pacific is transported eastward and then northward by the circulation of the South Pacific subtropical gyre and could influence positively the thermocline waters of the South Pacific being thus at the origin of the westward increase of the strongly negative  $N^*$  signal transported by the South Equatorial Current.

## 1 Introduction

It is commonly accepted that net biological activity is supported by the supply of new nitrogen into the surface productive layer (Dugdale and Goering, 1967; Capone et al., 2005). At the global ocean scale, Redfield et al. (1963) reported similarity



between nitrogen-to-phosphorus (N:P) ratios in surface ocean particulate organic matter (POM) and in deep water inorganic nutrients, and since then the canonical Redfield ratio (RR) of 16:1 has become a fundamental tenet in marine biogeochemistry (Deutsch and Weber, 2012). Deviations from this ratio have been used by marine geochemists to provide insights into nutrient limitation of primary production, efficiency of the biological carbon sequestration and dinitrogen ( $N_2$ ) fixation (Moore et al., 2013). The canonical RR of the organic and mineral matter is strongly variable at a regional scale (Moore et al., 2013) and mostly depends on nitrogen sources and sinks. The supply of nitrogen to the productive layer comes from turbulent mixing of water masses and diffusion (Oscillies and Garçon, 1998; Capone et al., 2005), atmospheric and river inputs (Hansell et al., 2004; Jickells et al., 2017) and  $N_2$  fixation, the conversion of atmospheric  $N_2$  into ammonia by diazotrophic organisms (Karl et al., 1992). These sources are continuously replaced by N loss processes, mainly driven by denitrification which converts nitrate ( $NO_3^-$ ) into  $N_2$  in Oxygen Minimum Zones (OMZ) (Codispoti and Richards, 1976). At the global ocean scale, the nitrogen budget is controlled by a balance between the main sources ( $N_2$  fixation), and sinks (denitrification and anammox) (Gruber and Sarmiento, 1997; Gruber, 2016), both mediated by microbial processes.

The spatial and temporal variability of the ocean nitrogen budget seems difficult to quantify from in situ measurements. Alternatively, the use of geochemical tracers based on nutrients ratios allows to visualize and quantify the excess of nitrogen over large time and space scales contrary to the biological estimates, which are often dedicated to process studies at the local scale and on short time scales. Broecker and Peng (1982) were the first to use a tracer to quantify the  $NO_3^-$  deficit in the Indian Ocean and in the Bering Sea by multiplying the observed phosphorus concentrations by the stoichiometric ratio of 15 and by subtracting the result obtained by the observed  $NO_3^-$  concentrations (Gruber and Sarmiento, 1997). Broecker (1974) and then Naqvi and Sen Gupta (1985) used the NO tracer to estimate the  $NO_3^-$  deficiency observed in the Arabian Sea. Michaels et al. (1996) and Gruber and Sarmiento (1997) proposed the  $N^*$  as a tracer to determine the proportion of changes in the fixed nitrogen ( $N_{org}$ ) (all nitrogenous forms except atmospheric  $N_2$ ) resulting from the combined effect of denitrification and/or of diazotrophy. Despite the apparent simplicity of the proposed formula (Eq. 3) there is nonetheless a certain complexity, especially in the deconvolution of the different processes influencing the intensity of this tracer. Factors may be biogeochemical, as phosphate ( $PO_4^{3-}$ ) uptake by diazotrophic organisms in the productive layer that will induce positive  $N^*$  variations (Fig. 1). The remineralization of organic matter from diazotrophic organisms, being naturally enriched in nitrogen (Redfield et al., 1963; Anderson and Sarmiento, 1995; Hansell et al., 2004), will supply nitrogen to the system and will positively influence the  $N^*$  (Fig. 1). On the opposite, denitrification will cause negative variations of  $N^*$  (Fig. 1), firstly because of the direct use of  $NO_3^-$  as an oxidant by heterotrophic bacteria, and secondly because of the conversion of organic nitrogen to  $N_2$  result, net positive changes in  $N^*$  will trace a source of nitrogen relative to phosphorus, and negative net changes will indicate nitrogen loss in the system through the denitrification process.

From the World Ocean Circulation Experiment (WOCE) cruises, Deutsch et al. (2001) showed that the  $N^*$  signal in the South Pacific presented maximum values at the surface, followed by a decrease with depth. The highest negative  $N^*$  signal ( $<10 \mu\text{mol kg}^{-1}$ ) for the entire South Pacific were found in the thermocline waters of the East Tropical South Pacific (ETSP) extending horizontally westwards from the South American coast ( $15^\circ \text{S}$ ), which was later confirmed by Rafter et al. (2012) and Yoshikawa et al. (2015). The OMZ of the ETSP is one of the three regions of the world ocean where strong denitrification occurs (Codispoti and Richards, 1976). Rafter et al. (2012) and Yoshikawa et al. (2015) suggested that the strongly negative  $N^*$  signal in the ETSP is likely to be induced by the mixing of sub-Antarctic Modal Waters (SAMW) from the Southern Ocean and waters in relation with the OMZ of the ETSP. On the opposite, the highest  $N^*$  values ( $>0$ ) were found in surface waters of the western subtropical waters near Australia (Deutsch et al., 2001), which is consistent with the high densities of diazotrophic organisms, including cyanobacteria *Trichodesmium* sp., found in the warm oligotrophic waters of the Western Tropical South Pacific (WTSP) (Moutin et al., 2005; Bonnet et al., 2009; Messer et al., 2015). This region has recently been identified as a globally important hot spot of  $N_2$  fixation with an average  $N_2$  rates of  $570 \mu\text{mol m}^{-2} \text{d}^{-1}$  (Bonnet et al., 2017),



but the effect of intense  $N_2$  fixation on geochemical properties of the waters masses in the WTSP and the whole South Pacific has never been investigated.

85 The aim of this study is to characterize in detail the  $N^*$  along trophic and  $N_2$  fixation gradients in the WTSP, and to assess the potential effect of intense  $N_2$  fixation on the geochemical properties of thermocline waters in the South Pacific. After a brief description of the main characteristics of water masses encountered during the Oligotrophy to ULtra-oligotrophy PACific Experiment (OUTPACE) cruise, the N and P pools, nutrient ( $NO_3^-$ ,  $PO_4^{3-}$ ), POM and dissolved organic matter (DOM) data, are presented emphasizing their stoichiometric ratios. Then, the different processes known to influence the  $N^*$  distribution are  
90 approached. Finally, the  $N^*$  distribution in the thermocline waters of the whole South Pacific will be presented and the influence of global circulation on local  $N^*$  signal discussed.

## 2 Materials and methods

### 2.1 Station location and sampling

The OUTPACE cruise took place between 18 February to 3 April 2015, between longitude 159.54° E and 160° W and latitude  
95 18° S and 22° S from Noumea (New Caledonia) to Papeete (French Polynesia) (Fig. 2a). A total of 18 stations were sampled. Station LD B is located at the geographical boundary between the Melanesian Archipelago (MA) and the waters of the South Pacific subtropical gyre (GY) (Fig. 2a). This station had high concentrations of chlorophyll-a at the surface induced by a common sub-mesoscale complex allowing the advection of surface waters from the MA towards the east (De Verneil et al., 2017). Stations SD 1 to LD B  
100 the remainder of this study be referred to as MA waters and will be color coded red, and stations SD 13 to SD 15 will be referred to as the waters of the GY and will be color coded blue (Fig. 2b).

All samples were collected with a CTD Sea-Bird 911+ combined with a carousel equipped with a 24 bottles rosette Niskin® 12 liters. The entire cruise program and sampling strategy is described in Moutin et al. (2017). Measurements of the oxygen sensors were calibrated on board using a chemical assay by the Winkler (1888) method modified by Carpenter (1965) and Carritt and Carpenter (1966) and according to the protocol described in Culbertson (1991) and Dickson (1996). The  
105 determination of the oxygen concentrations was carried out partly according to the photometric method (Williams and Jenkinson, 1982) and partly according to the potentiometric method (Titrino 716 DMS Metrohm®). The saturation oxygen concentration ( $[O_2]$  sat) was calculated for all stations sampled through the GSW Oceanographic Toolbox (McDougall and Barker, 2011). The Apparent Use of Oxygen (AOU) was calculated according to the following formula:

$$AOU = [O_2] \text{ sat} - [O_2] \text{ measured} = -\Delta O_2 \text{ (remin)} \quad (1)$$

110  $\Delta O_2$  (remin) is the change in oxygen due to the remineralization process, assuming that oxygen is at saturation when waters are in contact with the atmosphere.

### 2.2 Inorganic and organic pools

The samples used for the analysis of the inorganic nutrient were collected for each depth in a polypropylene scintillation bottle closed with a HDPE cap fixed with 50  $\mu\text{L}$  of  $HgCl_2$  (20  $\text{mg L}^{-1}$ ), and stored at 4 °C before analysis in the laboratory.  $PO_4^{3-}$  and  
115  $NO_3^-$  + nitrites ( $NO_2^-$ ) concentrations were determined automatically using the continuous flow method (Aminot and K rouel, 2007) using a SEAL Analytical AA3HR auto analyzer.  $NO_2^-$  is obtained according to a method based on the Griess reaction, adapted for seawater by Benscheider and Robinson (1952). The  $NO_3^-$  is obtained according to a technique developed by Wood et al. (1976).  $PO_4^{3-}$  is obtained according to the method adapted for seawater by Murphy and Riley (1962). The quantification limit (QL) for all nutrient is 0.05  $\mu\text{mol L}^{-1}$ . The data set of the SD 8 station is not taken into account in the results  
120 of this study due to an analytical problem.

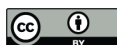

The samples used for the analysis of **nitrogen and particulate organic phosphate** (**PO<sub>4</sub><sup>3-</sup>**) were collected for each depth in polycarbonate bottles and 1.2 L were filtered through a precombusted (24h, 450 °C) glass fiber filter (Whatman GF/F, 25 mm). PON and POP concentrations were quantified using the wet oxidation method based on persulfate digestion at 120 °C (Pujo-Pay and Raimbault, 1994). NO<sub>3</sub><sup>-</sup> and PO<sub>4</sub><sup>3-</sup> formed by oxidation were analyzed using the auto analyzer SEAL Analytical AA3HR as described above. The **QL** of **POP** was 0.001 μmol L<sup>-1</sup> and of PON 0.02 μmol L<sup>-1</sup>. The dissolved organic nitrogen (DON) and phosphorus (DOP) samples were collected in 100 mL combusted glass bottles from each depth and immediately filtered through 2 precombusted (24 h, 450 °C) glass fiber filters (Whatman GF/F, 25 mm). Filtered samples were collected in teflon vials adjusted to 20 ml for wet oxidation. DON and DOP concentrations were obtained by the **wet oxidation procedure according to Pujo-Pay and Raimbault (1994)** after collection, 2.5 mL of the oxidative reagent were added to the samples that were then heated to 120 °C for 30 min. After cooling, the concentration of Total Dissolved Nitrogen (TDN) and Total Dissolved Phosphorus (TDP) was determined using **continuous flow analysis (AAIII HR)**. **N** is obtained by the difference between TDN and Inorganic Nitrogen species (NO<sub>3</sub><sup>-</sup> + NO<sub>2</sub><sup>-</sup> + NH<sub>4</sub><sup>+</sup>). DOP was obtained by the difference between TDP and Dissolved Inorganic Phosphorus (PO<sub>4</sub><sup>3-</sup>). The **QL** of **POP** was fixed at 0.05 μmol L<sup>-1</sup> and of DON 0.50 μmol L<sup>-1</sup>. All DON and DOP data from the SD 3 and SD 15 stations are not taken into account in the results of this study due to an analytical problem.

### 2.3 N<sub>2</sub> fixation rates

N<sub>2</sub> fixation rates were measured in triplicate at all stations (except SD13) using the <sup>15</sup>N<sub>2</sub> isotopic tracer technique (adapted from Montoya et al., 1996). Briefly, seawater samples were collected in HCl-washed, sample-rinsed (3 times) light-transparent polycarbonate 2.3 L bottles from 6 depths (75 %, 50 %, 20 %, 10 %, 1 %, and 0.1 % surface irradiance levels), sealed with caps fitted with silicon septa and amended with 2 mL of 98.9 atom% <sup>15</sup>N<sub>2</sub> (Cambridge isotopes). Incubation bottles were incubated in on-deck incubators equipped with circulating seawater at the specified irradiances using blue screening. Incubations were stopped by filtration of the entire sample onto precombusted glass fiber (Whatman GF/F, 25 mm, 0.7 μm nominal pore size) filters, which were then analyzed for <sup>15</sup>N/<sup>14</sup>N ratios and PON concentrations using an elemental analyzer coupled to a mass spectrometer (EA-IRMS, Integra CN, SerCon Ltd) as described in **Bonnet et al., (This issue)**.

### 2.4 Calculation of PON excess

The excess of PON (PON<sub>excess</sub>) represents the difference between the measured PON concentrations and the PON concentrations calculated based on the RR (PON: POP = 16: 1). It was calculated as follows:

$$\text{PON}_{\text{excess}} = \text{PON}_{\text{measured}} - 16 \times \text{POP}_{\text{measured}} \quad (\mu\text{mol L}^{-1}) \quad (2)$$

### 2.5 Calculation of N\*

The N\* signal was calculated from the definition of Deutsch et al (2001).

$$\text{N}^* = \text{NO}_3^- - r_{\text{nitr}}^{\text{N/P}} \text{PO}_4^{3-} + 2.90 \quad (\mu\text{mol L}^{-1}) \quad (3)$$

PO<sub>4</sub><sup>3-</sup> is the concentration of "soluble reactive phosphate" (μmol L<sup>-1</sup>). The concentrations of NO<sub>3</sub><sup>-</sup> and PO<sub>4</sub><sup>3-</sup> are linked together by the stoichiometric ratio  $r_{\text{nitr}}^{\text{N/P}} = 16$  determined by Redfield et al. (1963) and Takahashi et al. (1985). Equation (3) assumes that the effect of the biological pump is absolute and if N\* is zero, that is the difference between NO<sub>3</sub><sup>-</sup> and remineralized PO<sub>4</sub><sup>3-</sup> is constant (Gruber and Sarmiento, 1997). The constant 2.90 makes it possible to force to zero the overall average value of the N\* calculated from **GEOSECS** data (Geochemical Ocean Sections Study, 1972-1978) (Deutsch et al., 2001). This constant has been included in this study in order to compare the observations with the literature data.



In surface waters, above isopycnal 23.5 ( $\sigma_{23.5}$ ), the  $\text{NO}_3^-$  concentrations were not measurable and did not allow direct calculation of the  $\text{N}^*$  anomaly. Considering only  $\text{PO}_4^{3-}$  data above QL in surface waters, an  $\text{N}^*$  estimate ( $\text{N}^*_{\text{surf}}$ ) was carried out considering that below QL,  $\text{NO}_3^-$  concentrations were between 0 and  $0.05 \mu\text{mol L}^{-1}$ .

$$-16 \times \text{PO}_4^{3-} + 2.9 \leq \text{N}^*_{\text{surf}} \leq 0.05 - 16 \times \text{PO}_4^{3-} + 2.9 \quad (4)$$

In the WTSP, the upper thermocline waters are characterized by maximum subsurface salinity (Tomczak and Hao 1989; Donguy 1994; Donguy and Henin 1997) and the underlying waters of the permanent thermocline are marked by wide range of temperature and salinity (Emery and Meincke, 1986; Sprintall and Tomczak, 1992; Tomczak and Godfrey, 1994). To visualize the variations of  $\text{N}^*$  in the thermocline waters of the OUTPACE section, the  $\text{N}^*$  anomaly has been represented on isopycnal surfaces 24.70 and 26.30, which respectively correspond to the cores of the upper and lower thermoclines observed on the  $\Theta$ -S diagram (Fig. 4a). Density,  $\text{NO}_3^-$ ,  $\text{PO}_4^{3-}$ , and  $\text{N}^*$  anomaly data were interpolated linearly between  $\sigma_{24.65}$  and  $\sigma_{24.75}$  and between  $\sigma_{26.25}$  and  $\sigma_{26.35}$ . The mean and standard deviation of interpolated  $\text{N}^*$  values was calculated for all stations on  $\sigma_{24.70} \pm 0.05$  and  $\sigma_{26.30} \pm 0.05$ .

## 2.6 Variability of the $\text{PO}_4^{3-}$ pool

The difference in average concentration observed in  $\text{PO}_4^{3-}$  between the MA and the GY waters ( $\Delta\text{PO}_4^{3-}\text{observed}$ ) was calculated from means ( $\pm\text{sd}$ ) observed in surface waters ( $< \sigma_{23.5}$ ) and is equal to:

$$\Delta\text{PO}_4^{3-}\text{observed} = \text{PO}_4^{3-}\text{observed (MA)} - \text{PO}_4^{3-}\text{observed (GY)} \quad (5)$$

From the estimate of  $\text{N}^*_{\text{surf}}$  in surface waters ( $< \sigma_{23.5}$ ), the difference between the mean concentrations observed in  $\text{N}^*$  ( $\Delta\text{N}^*$ ) in the surface MA and surface GY waters is equal to:

$$\Delta\text{N}^* = \text{N}^*_{\text{mean (MA)}} - \text{N}^*_{\text{mean (GY)}} \quad (6)$$

Assuming that the formation of the organic matter is consistent with the RR, the variation of  $\text{PO}_4^{3-}$  concentrations induced by the excess nitrogen supply in the MA ( $\Delta\text{PO}_4^{3-}\text{estimated}$ ) is equal to:

$$\Delta\text{PO}_4^{3-}\text{estimated} = -\Delta\text{N}^*/16 \quad (7)$$

## 2.7 GLODAPv2 database

The Global Ocean Data Analysis Project version 2 (GLODAPv2) is an international effort to consolidate all data from ocean bottle samples collected as part of many oceanic cruises (Olsen et al., 2016). Previous databases, WOCE/JGOFS combined in GLODAPv1 in 2004 (Sabine et al., 2005; Key et al., 2004), CARINA (CARbon IN the Atlantic) in 2009/2010 (Key et al., 2010; Tanhua et al., 2009), and PACIFICA (PACIFIC ocean Interior CARbon) in 2013 (Suzuki et al., 2013) as well as 168 additional cruises were grouped together and have undergone one and only high-quality control based on two steps (primary and secondary QC) applied to each data. The GLODAPv2 database is available at <http://cdiac.ornl.gov/oceans/GLODAPv2/> and the details of the overall production strategy explained in Olsen et al. (2016). The GLODAPv2 database includes samples of core variables such as salinity, oxygen, macronutrients, and seawater  $\text{CO}_2$  chemistry from 724 oceanic cruises. In this study, we focused on two variables:  $\text{NO}_3^-$  and  $\text{PO}_4^{3-}$  and we calculated  $\text{N}^*$  according to the formula of Deutsch et al. (2001) (Eq. 3) for all available data in the South Pacific. The details of the available cruises are shown in figure 3 and in Table S1. Similar to OUTPACE data processing, the density,  $\text{NO}_3^-$ ,  $\text{PO}_4^{3-}$ , and  $\text{N}^*$  anomaly data were interpolated linearly between  $\sigma_{24.65}$  and  $\sigma_{24.75}$  and between  $\sigma_{26.25}$  and  $\sigma_{26.35}$ .



### 195 3 Results

In order to replace the OUTPACE cruise within the context of the general circulation in the South Pacific we start by a global survey (Fig. 2b). The South Equatorial Current (SEC) represents the northern branch of the southern subtropical anticyclonic gyre from the eastern boundary Peru-Chile Current (PCC) to the Coral Sea and the southwestern Pacific (Wyrski, 1975; Solokov and Rintoul, 2000; Talley et al., 2011; Kessler and Cravatte, 2013). At depth, the SEC transports thermocline waters which are salty (larger than 35), and thus makes it possible to spatially couple the TSP and the WTSP. Arriving to the MA, the SEC is divided into two branches: The North Vanuatu Jet (NVJ) which brings warm and relatively low oxygenated waters (Wyrski, 1962b; Solokov and Rintoul, 2000; Webb, 2000) and the North Caledonian Jet (NCJ) which flows 8° S between the surface and 1500 m and transports more oxygenated waters (Gourdeau et al., 2008; Kessler and Cravatte, 2013; Gasparin et al., 2014). At its arrival to the Australian coasts, the SEC bifurcates and becomes the East Australian Current (EAC) to the south and the North Queensland Current (NQC) toward the north and the Solomon Sea. Near 30° S, the EAC breaks down into several branches: one continuing south of 40° S, another one returning to the north through whirlwinds and meanders (Church 1987; Solokov and Rintoul 2000; Marchesiello and Middleton, 2000). The last part flows eastward along the Tasman Front (TF) (40°–45° S) through north of New Zealand to become East Auckland Current (EAUC). It then joins back into and the circulation of the anticyclonic gyre through the South Pacific Current (SPC) which mostly circulates nearby the latitude of 30° S (Stramma et al., 1995; Talley et al., 2011). The CTD profiles collected during the OUTPACE cruise take place in the southwestern Pacific region when the SEC encounters the Fiji and New Caledonia (Fig. 2a; 2b).

#### 3.1 Water masses and general biogeochemical trends

Figure 4a shows the superimposition of  $\Theta$ -S diagrams (0–2000 dbar) for all 18 stations sampled during the cruise. The temperature range observed on the OUTPACE section varied from 29.92 °C at the surface to 1.99 °C at 2000 dbar depth (Fig. 4a). Salinity varied from 34.32 to 36.11 (Fig. 4a). The surface waters (SW) were in the range between  $\sigma_{21.7}$  and  $\sigma_{23.5}$  (4.12–71.30 dbar, Table 1) and had a temperature range of 25.60 °C to 29.93 °C and were marked by small longitudinal variations (Fig. 4a). Surface salinity values ranged from 34.89 for the most westerly stations (Fig. 4a) to 35.67 for the most easterly stations (Fig. 4a). The concentrations of AOU were close to zero or slightly negative in the SW for all the stations (Fig. 4b). A minimum of AOU concentrations of about -14  $\mu\text{mol kg}^{-1}$  was visible between  $\sigma_{23}$  and  $\sigma_{23.5}$  (Fig. 4b). In the SW of the MA,  $\text{N}_2$  fixation rates ranged from 1.41 to 42.25  $\text{nmol N L}^{-1} \text{d}^{-1}$  with an average rate of  $12.38 \pm 9.80 \text{ nmol N L}^{-1} \text{d}^{-1}$  (Fig. 4d, Table 1). Rates decreased drastically towards the GY values ranging 0.01 and 2.29  $\text{nmol N L}^{-1} \text{d}^{-1}$  and an average rate of  $0.75 \pm 0.90 \text{ nmol N L}^{-1} \text{d}^{-1}$  (Fig. 4d, Table 1). Between  $\sigma_{23.5}$  and  $\sigma_{25.4}$ , the Upper Thermocline Waters (UTW) (35.42–501.21 dbar, Table 2) were characterized by a temperature and salinity range between 19.26 °C and 26.55 °C and 35.58 and 35.90, respectively (Fig. 4a). A salinity maximum ( $S_{\text{max}}$ ) was observed between  $\sigma_{24}$  and  $\sigma_{25.4}$ , centered on  $\sigma_{24.7}$  (Fig. 4a). The  $S_{\text{max}}$  had maximum values in the UTW of the GY ( $S \approx 36.11$ ) and tended to decrease to reach a maximum of 35.6–35.7 in the UTW of the MA (Fig. 4a). An increase in Chl-a concentrations was observed in the upper part of the UTW (Fig. 4c).  $\text{N}_2$  fixation rates decreased sharply between  $\sigma_{23.5}$  and  $\sigma_{24.7}$  and reached homogeneous values between 0.01 and 1.73  $\text{nmol N L}^{-1} \text{d}^{-1}$  in the MA waters and between 0.01 and 1.18  $\text{nmol N L}^{-1} \text{d}^{-1}$  in the GY waters (Fig. 4d). The AOU concentrations increased for all the stations with nevertheless a significant variability of the observed values which varied from -10.10 to 55.70  $\mu\text{mol kg}^{-1}$  in the UTW of the MA and between -7.40 and 40.90  $\mu\text{mol kg}^{-1}$  in the UTW of the GY (Fig. 4b). Between  $\sigma_{25.4}$  and  $\sigma_{26.7}$  (249.14–501.21 dbar, Table 3), a strong decreasing gradient of temperature and associated salinity marked the presence of Lower Thermocline Waters (LTW). The values of temperature and salinity varied little from east to west on  $\sigma_{25.40}$  and were  $19.34 \pm 0.11$  °C and  $35.61 \pm 0.03$  (Fig. 4a), respectively. In the LTW, the temperature and salinity ranged from 19.26 °C to 9.34 °C and from 35.72 to 34.54, respectively (Fig. 4a). The core of the LTW ( $\sigma_{26.3}$ ) was colder ( $T = 12.93 \pm 0.09$  °C), less salty ( $S = 34.87 \pm 0.02$ ) in the GY than in the MA ( $T = 13.68 \pm 0.26$  °C,  $S = 35.07 \pm 0.06$ ) (Fig. 4a). The AOU concentrations





increased almost linearly in the LTW and ranged from 38.20 to 93.20  $\mu\text{mol kg}^{-1}$  in the MA and between 54.70 and 130.50  $\mu\text{mol kg}^{-1}$  in the GY (Fig. 4b). Below  $\sigma_{25.4}$ , the Chl-a concentrations were close to zero for all the stations (Fig. 4c) and the  $\text{N}_2$  fixation rates were undetectable (Fig. 4d). Subantarctic Modal Water (SAMW) and Intermediate Antarctic waters (AAIW) were considered in this study as a single water mass that flowed between  $\sigma_{26.7}$  and  $\sigma_{27.3}$  (496.91–909 dbar, Table 4) and was characterized by a minimum of salinity ( $S=34.37 \pm 0.02$ ) centered on  $\sigma_{27.1}$  (Fig. 4a). Deep waters ( $\sigma_{27.30}$ – $\sigma_{27.65}$ ) (Upper Circumpolar Deep Water, UCDW) were characterized by an increase in salinity and a decrease in temperature. On  $\sigma_{27.65}$  the salinity and temperature, respectively, reached  $34.62 \pm 0.01$  and  $2.25 \pm 0.04$  °C (Fig. 4a).

### 3.2 Inorganic nutrient pools

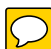

The properties observed in the MA and GY waters differed greatly. The MA waters showed in the productive layer ( $\approx 0$ –150 dbar)  $\text{NO}_3^-$  concentrations below the QL,  $\text{PO}_4^{3-}$  concentrations below or close QL, and high concentrations of PON and POP (Fig. 5).  $\text{PO}_4^{3-}$  concentrations increased in the productive layer of the GY waters, along with a decrease in PON and POP concentrations (Fig. 5).

The concentrations of  $\text{NO}_3^-$  were below the QL ( $0.05 \mu\text{mol L}^{-1}$ ) in the SW for all stations (Fig. 6a). The concentrations of  $\text{PO}_4^{3-}$  were low in the SW of the MA and ranged between 0.05 and  $0.17 \mu\text{mol L}^{-1}$  (mean= $0.08 \pm 0.03$ ) (Fig. 6b, Table 1). An increase in  $\text{PO}_4^{3-}$  concentrations was observed in the SW of the GY with values ranging between 0.11 and  $0.17 \mu\text{mol L}^{-1}$  (mean= $0.15 \pm 0.02$ ) (Fig. 6b, Table 1). The  $\text{NO}_3^-$  concentrations became quantifiable from  $\sigma_{23.5}$  and increased gradually. In the UTW, the mean  $\text{NO}_3^-$  concentration was  $2.35 \pm 1.59 \mu\text{mol L}^{-1}$  in the MA and  $2.19 \pm 1.90 \mu\text{mol L}^{-1}$  in the GY (Fig. 6a, Table 2). The  $\text{PO}_4^{3-}$  concentrations were  $0.24 \pm 0.11 \mu\text{mol L}^{-1}$  in the MA and  $0.28 \pm 0.15 \mu\text{mol L}^{-1}$  in the GY (Fig. 6b, Table 2). In the LTW, the concentrations increased with depth. The  $\text{NO}_3^-$  concentrations ranged between 4.13 and  $18.35 \mu\text{mol L}^{-1}$  (mean= $10.07 \pm 4.53$ ) in the MA and between 6.42 and  $18.69 \mu\text{mol L}^{-1}$  (mean= $11.33 \pm 4.46$ ) in the GY (Fig. 6a, Table 3). The  $\text{PO}_4^{3-}$  concentrations ranged between 0.35 and  $1.31 \mu\text{mol L}^{-1}$  (mean= $0.77 \pm 0.31$ ) in the MA and between 0.57 and  $1.44 \mu\text{mol L}^{-1}$  (mean= $0.92 \pm 0.29$ ) in the GY (Fig. 6b, Table 3). In the SAMW/AAIW, the  $\text{NO}_3^-$  concentrations increased from 19.62 to  $33.81 \mu\text{mol L}^{-1}$  (mean= $26.91 \pm 4.32$ ) in the MA and from 23.60 to  $34.26 \mu\text{mol L}^{-1}$  (mean= $29.16 \pm 4.17$ ) in the GY (Fig. 6a, Table 4). The  $\text{PO}_4^{3-}$  concentrations increased from 1.37 to  $2.32 \mu\text{mol L}^{-1}$  (mean= $1.88 \pm 0.29$ ) in the MA and from 1.67 to  $2.35 \mu\text{mol L}^{-1}$  (mean= $2.03 \pm 0.25$ ) in the GY (Fig. 6b, Table 4). The bottom waters ( $>\sigma_{27.5}$ , 1000–2000 dbar) had relatively homogeneous maximum concentrations with a range of values in  $\text{NO}_3^-$  and  $\text{PO}_4^{3-}$  between 35.10 and  $36.50 \mu\text{mol L}^{-1}$  and between 2.40 and  $2.55 \mu\text{mol L}^{-1}$ , respectively (Fig. 6a, Fig. 6b).

The  $\text{NO}_3^-$ :  $\text{PO}_4^{3-}$  ratio increased sharply in the UTW. In the UTW of the MA, the ratio ranged between 0.36 and 13.04 (mean= $8.09 \pm 3.65$ ) and between 0.36 and 9.77 (mean= $5.49 \pm 3.62$ ) in the UTW of the GY (Fig. 6c, Table 2). In the LTW, the  $\text{NO}_3^-$ :  $\text{PO}_4^{3-}$  ratio increased with a lower slope and rose from 11.33 to 14.33 (mean= $12.92 \pm 0.82$ ) in the MA and from 10.64 to 14.00 (mean= $12.06 \pm 1.16$ ) in the GY (Fig. 6c, Table 3). The  $\text{NO}_3^-$ :  $\text{PO}_4^{3-}$  ratio reached stable and uniform values in bottom waters of the MA and the GY between 13.80 and 15.20 (Fig. 6c). A linear regression ( $R^2=0.998$ ) was observed between  $\text{NO}_3^-$  and  $\text{PO}_4^{3-}$  concentrations during the OUTPACE cruise. The slope was 15.01, which was close to the RR of 16:1 (Fig. 6d). In the upper waters, the depletion of  $\text{NO}_3^-$  is higher than the depletion of  $\text{PO}_4^{3-}$ . A deficit in  $\text{NO}_3^-$  compared to the value expected by RR (dashed black line) was observed for all the data (Fig. 6d).

### 3.3 Organic pools

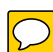

Maximum PON and POP concentrations were observed in the SW of the MA. The PON concentrations ranged between 0.271 and  $1.175 \mu\text{mol L}^{-1}$  (Fig. 7a) and the concentrations of POP ranged between 0.016 and  $0.057 \mu\text{mol L}^{-1}$  (Fig. 7b). The minimum concentrations were observed in the SW of the GY, with respective PON and POP values between 0.166 and  $0.315 \mu\text{mol L}^{-1}$  (Fig. 7a) and between 0.011 and  $0.019 \mu\text{mol L}^{-1}$  (Fig. 7b). On average, the PON and POP concentrations were approximately

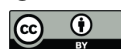

twice as high in the SW of the MA ( $\text{PON}_{\text{mean}} = 0.549 \pm 0.183 \mu\text{mol L}^{-1}$ ,  $\text{POP}_{\text{mean}} = 0.029 \pm 0.007 \mu\text{mol L}^{-1}$ ) as in the SW of the GY ( $\text{PON}_{\text{mean}} = 0.209 \pm 0.036 \mu\text{mol L}^{-1}$ ,  $\text{POP}_{\text{mean}} = 0.014 \pm 0.003 \mu\text{mol L}^{-1}$ ) (Table 1). In the UTW, significant attenuation of POM concentrations was observed. The mean concentrations, however, remain higher in the UTW of MA ( $\text{PON}_{\text{mean}} = 0.210 \pm 0.114 \mu\text{mol L}^{-1}$ ,  $\text{POP}_{\text{mean}} = 0.013 \pm 0.007 \mu\text{mol L}^{-1}$ ) than in the UTW of the GY ( $\text{PON}_{\text{mean}} = 0.151 \pm 0.078 \mu\text{mol L}^{-1}$ ,  $\text{POP}_{\text{mean}} = 0.009 \pm 0.005 \mu\text{mol L}^{-1}$ ) (Fig. 7a, Fig. 7b, Table 2). POM concentrations decrease to reach minimum and relatively stable values in the LTW. PON concentrations in the LTW of MA ranged from 0.051 to 0.134  $\mu\text{mol L}^{-1}$  (mean =  $0.084 \pm 0.019$ ) and POP concentrations ranged from 0.003 to 0.008  $\mu\text{mol L}^{-1}$  (mean =  $0.005 \pm 0.001$ ) (Fig. 7a, Fig. 7b, Table 3). The PON concentrations in the LTW of the GY were between 0.050 and 0.097  $\mu\text{mol L}^{-1}$  (mean =  $0.067 \pm 0.017$ ) and the POP concentrations were between 0.003 and 0.006  $\mu\text{mol L}^{-1}$  (mean =  $0.005 \pm 0.001$ ). (Fig. 7a, Fig. 7b, Table 3).

For all the stations and for all the depths sampled, the PON:POP ratio was between 10.08 and 25.78 (Fig. 7c). The average value of the PON:POP ratio was  $16.89 \pm 2.37$ , which was close to the RR. Nevertheless, a strong variability was observed between the different oceanic regions (MA vs GY) and on the water masses considered. In the SW, the PON:POP ratio varied from 14.56 to 25.32 (mean =  $18.50 \pm 2.44$ ) in the MA and between 12.59 and 20.15 (mean =  $15.58 \pm 1.57$ ) in the GY (Fig. 7c, Table 1). In the UTW, the PON:POP ratio was between 13.07 and 20.04 (mean =  $16.39 \pm 1.48$ ) in the MA and between 14.50 and 18.65 (mean =  $16.27 \pm 1.05$ ) in the GY (Fig. 7c, Table 2). In the LTW, the PON:POP ratio showed a strong inter-station disparity. The PON:POP ratio was between 12.85 and 25.78 (mean =  $16.79 \pm 3.19$ ) in the MA and between 13.80 and 15.80 (mean =  $14.91 \pm 0.92$ ) in the GY (Fig. 7c, Table 3). For PON concentrations not exceeding 0.400  $\mu\text{mol L}^{-1}$  and 0.025  $\mu\text{mol L}^{-1}$  in POP, there was a strong correlation ( $R^2 = 0.962$ ) and a slope of 15.145 close to the RR for the GY waters (blue markers in Fig. 7d). The highest MOP concentrations showed an excess of PON over POP with a slope of 19.963 and a significant deviation from the expected RR for the MA stations (red markers in Fig. 7d). PON in excess of the expected RR had the highest concentration between surface and  $\sigma_{22.5}$  ( $\approx 0$ –25 dbar) for the MA stations with a maximum PON excess of 0.370  $\mu\text{mol L}^{-1}$  (Fig. 8). PON excess decreased between  $\sigma_{22.5}$  and  $\sigma_{23.5}$ . In the UTW and LTW, PON excess disappeared and the PON concentrations were close to those calculated on the basis of the RR (Fig. 8).

In the SW, the DON and DOP concentrations were maximum. DON concentrations ranged from 4.77 to 6.81  $\mu\text{mol L}^{-1}$  (mean =  $5.49 \pm 0.44$ ) in the SW of the MA and between 4.74 and 6.39  $\mu\text{mol L}^{-1}$  (mean =  $5.13 \pm 0.46$ ) in the SW of the GY (Fig. 9a, Table 1). In the SW of MA, DOP concentrations ranged between 0.10 and 0.30  $\mu\text{mol L}^{-1}$  (mean =  $0.16 \pm 0.03$ ) and between 0.16 and 0.23  $\mu\text{mol L}^{-1}$  (mean =  $0.19 \pm 0.03$ ) in the SW of the GY (Fig. 9b, Table 1). DOM concentrations decreased in the UTW and then remained relatively stable in the LTW. The DON concentrations ranged between 2.77 and 4.25  $\mu\text{mol L}^{-1}$  (mean =  $3.50 \pm 0.38$ ) in the LTW of MA and between 2.78 and 4.01  $\mu\text{mol L}^{-1}$  (mean =  $3.45 \pm 0.41$ ) in the LTW of the GY (Fig. 9a, Table 3). DOP concentrations ranged from 0.02 to 0.12  $\mu\text{mol L}^{-1}$  (mean =  $0.06 \pm 0.03$ ) in the LTW of the MA and between 0.02 and 0.08  $\mu\text{mol L}^{-1}$  (mean =  $0.04 \pm 0.02$ ) in the LTW of GY (Fig. 9b, Table 3). For all the stations and the entire water column, the DON:DOP ratio was far from the RR. Minimum values were observed in the SW with nevertheless higher values in the MA. The ratio DON:DOP ranged between 18.70 and 57.70 (mean =  $34.15 \pm 5.96$ ) in the SW of the MA and between 22.48 and 32 (mean =  $27.83 \pm 2.72$ ) in the SW of the GY (Fig. 9c, Table 1). An increase of the DON: DOP ratio and its dispersion were observed in the UTW and the LTW. In the LTW, the DON:DOP ratio varied from 31.75 to 182 (Fig. 9c, Table 3).

### 3.4 Distribution of $\text{N}^*$ , $\text{N}_2$ fixation rates and variations of $\text{PO}_4^{3-}$ pool

The range of  $\text{N}^*$  concentrations varied between -2.52 and 2.15  $\mu\text{mol L}^{-1}$  along the transect (Fig. 10). A positive  $\text{N}^*$  anomaly between 0.23 and 2.15  $\mu\text{mol L}^{-1}$  was observed in the SW, (0–50 dbar) sampled with a strong disparity of the signal marked by values between 0.23 and 1.19  $\mu\text{mol L}^{-1}$  in the SW of the GY and between 0.25 and 2.15  $\mu\text{mol L}^{-1}$  in the SW of the MA (Fig. 10). The UTW and LTW (100–500 dbar) showed a significant difference between the MA and GY waters. In the MA, the  $\text{N}^*$  signal in UTW was positive (mean =  $1.11 \pm 0.53$ ) with values ranging between -0.12 and 2.13  $\mu\text{mol L}^{-1}$  and negative in the GY





(mean =  $-0.14 \pm 0.49$ ) with values between  $-1.13$  and  $0.75 \mu\text{mol L}^{-1}$  (Fig. 10b, Table 2). In the LTW, a disparity in  $\text{N}^*$  concentrations was observed, marked by a difference between the MA and GY waters. The latter showed a weaker and mostly negative signal from 150 dbar depth (Fig. 10a). In the LTW, the  $\text{N}^*$  concentrations ranged between  $-0.49$  and  $1.52 \mu\text{mol L}^{-1}$  (mean =  $-0.75 \pm 0.54$ ) in the waters of the MA and between  $-1.55$  and  $0.72 \mu\text{mol L}^{-1}$  (mean =  $-0.51 \pm 0.78$ ) in GY (Fig. 10b, Table 3). The  $\text{N}^*$  signal had a minimum value of  $-0.77 \mu\text{mol L}^{-1}$  at 500 dbar depth in the MA waters and  $-1.55 \mu\text{mol L}^{-1}$  at 400 dbar depth in the GY waters (Fig. 10a). Above 400 bar depth, the dispersion of the signal was attenuated, and the concentrations gradually decreased to reach at 2000 dbar depth values which was mostly negative for all the stations, ranging between  $-2.24$  and  $-1.19 \mu\text{mol L}^{-1}$  in the MA waters and between  $-1.35$  and  $-0.51 \mu\text{mol L}^{-1}$  in the GY waters (Fig. 10a). Figure 11 shows the variability of  $\text{N}^*$  concentrations over the isopycnals  $\sigma_{24.7}$  and  $\sigma_{26.3}$ . Independently of the isopycnal, the  $\text{N}^*$  anomaly was minimum in the GY and maximum in the MA waters. In the MA waters, between SD 1 and SD 12, the  $\text{N}^*$  anomaly was within  $\sigma_{24.7}$  between  $1.05 \pm 0.01$  and  $1.77 \pm 0.02 \mu\text{mol kg}^{-1}$  and between  $-0.02 \pm 0.02$  and  $1.21 \pm 0.02 \mu\text{mol kg}^{-1}$  on  $\sigma_{26.3}$ . A drastic decrease of the  $\text{N}^*$  anomaly was observed on  $\sigma_{24.7}$  and  $\sigma_{26.3}$  between SD 12 and SD 15. A minimum was observed at SD 15 station with values of  $-0.68 \pm 0.07 \mu\text{mol kg}^{-1}$  on  $\sigma_{24.7}$  and  $-1.46 \pm 0.02 \mu\text{mol kg}^{-1}$  on  $\sigma_{26.3}$  (Fig. 11).  $\text{N}_2$  fixation rates integrated upon the water column in the MA was between  $100.39$  and  $840.56 \mu\text{mol N m}^{-2} \text{d}^{-1}$  (red circle in Fig. 11) and the average integrated fixation rate was  $442.81 \pm 203.53 \mu\text{mol N m}^{-2} \text{d}^{-1}$ . A sharp decrease in integrated  $\text{N}_2$  fixation rates was observed in the SW of the GY, with values between  $4.79$  and  $72.53 \mu\text{mol N m}^{-2} \text{d}^{-1}$  (blue circle in Fig. 11) with an average value of  $27.88 \pm 38.69 \mu\text{mol N m}^{-2} \text{d}^{-1}$ . The average difference in  $\text{PO}_4^{3-}$  concentrations observed between the SW of the MA and the GY ( $\Delta\text{PO}_4^{3-}$  observed) was  $-0.07 \pm 0.01 \mu\text{mol L}^{-1}$ . From the estimation of  $\text{N}^*$  in the SW, the difference between the average concentrations observed in  $\text{N}^*$  ( $\Delta\text{N}^*$ ) in the SW of the MA and the GY was  $1.05 \pm 0.37 \mu\text{mol L}^{-1}$ . The variation in  $\text{PO}_4^{3-}$  concentrations induced by the excess supply of nitrogen in the MA ( $\Delta\text{PO}_4^{3-}$  estimated) was equal to  $-0.07 \pm 0.03 \mu\text{mol L}^{-1}$ .

### 3.5 Distribution of $\text{N}^*$ signal at the South Pacific scale

On  $\sigma_{24.7}$ , the  $\text{N}^*$  signal was minimum between latitude  $5^\circ \text{S}$  and  $20^\circ \text{S}$  and longitude  $80^\circ \text{W}$  and  $100^\circ \text{W}$  (P21, P18, P19 sections in Fig. 12a) with an average value of about  $-4.63 \pm 0.80 \mu\text{mol kg}^{-1}$  on sections P21 and a minimum value ranged between  $-6.40$  and  $-6.20 \mu\text{mol kg}^{-1}$  on sections P18 and P19 (Fig. 12a), respectively. Between latitude  $5^\circ \text{S}$  and  $15^\circ \text{S}$ , the  $\text{N}^*$  signal observed in the OMZ region increased during its westward transport by the northern branch of the SEC. Between latitude  $5^\circ \text{S}$  and  $15^\circ \text{S}$ , the  $\text{N}^*$  signal reached  $-3.50 \pm 0.90 \mu\text{mol kg}^{-1}$  at longitude  $135^\circ \text{W}$  (P16S section in Fig. 12a),  $-1.83 \pm 0.60 \mu\text{mol kg}^{-1}$  at longitude  $150$ – $155^\circ \text{W}$  (P16C section in Fig. 12a),  $-1.34 \pm 0.55 \mu\text{mol kg}^{-1}$  at longitude  $170^\circ \text{W}$  (P15 section in Fig. 12a). The  $\text{N}^*$  signal carried by the NVJ (Fig. 2b) increased in the WTSP and reached  $-0.27 \pm 0.97 \mu\text{mol kg}^{-1}$  at longitude  $155^\circ \text{E}$  (P11S section in Fig. 12a). South of  $15^\circ \text{S}$ , the strongly negative  $\text{N}^*$  signal increased more rapidly in the UTW. During the westward transport of the UTW by the southern branch of the SEC,  $\text{N}^*$  signal increased from  $-4.37$  to  $-0.44 \mu\text{mol kg}^{-1}$  (mean =  $-2.00 \pm 1.00$ ) between longitude  $100^\circ \text{W}$  and  $150^\circ \text{W}$  (P21 section in Fig. 12a). In the WTSP between longitude  $175^\circ \text{E}$  and  $150^\circ \text{E}$ ,  $\text{N}^*$  signal increased sharply during the westward transport of waters by the NCJ (Fig. 2b) reaching values of  $0.39 \pm 0.58 \mu\text{mol kg}^{-1}$  (P21 section in Fig. 12a).  $\text{N}^*$  signal was greatest in the UTW of the Coral and Tasman seas. Between latitude  $23^\circ \text{S}$  and  $30^\circ \text{S}$ ,  $\text{N}^*$  reached  $1.69 \pm 0.16 \mu\text{mol kg}^{-1}$  (P14C section), and  $1.86 \pm 0.19 \mu\text{mol kg}^{-1}$  (P15 section in Fig. 12a). On  $\sigma_{26.3}$ ,  $\text{N}^*$  signal reached a mean minimum value of  $-18.08 \pm 1.69 \mu\text{mol kg}^{-1}$  in the OMZ region between longitude  $80^\circ \text{W}$  and  $90^\circ \text{W}$  and latitude  $18^\circ \text{S}$  (P21, GT13 sections in Fig. 12b, Fig. S2).  $\text{N}^*$  signal was minimum between latitude  $5^\circ \text{S}$  and  $15^\circ \text{S}$  and longitude  $90^\circ \text{W}$  with an average value of  $-10.31 \pm 6.58 \mu\text{mol kg}^{-1}$  and between latitude  $15^\circ \text{S}$  and  $23^\circ \text{S}$  with an average value of  $-11.62 \pm 4.13 \mu\text{mol kg}^{-1}$  (P19 sections in Fig. 12b, Fig. S2). Maximum values of  $\text{N}^*$  was observed in the MA waters of the OUTPACE section in the southern Coral Sea and Tasman Sea. The  $\text{N}^*$  signal reached  $0.52 \pm 0.12 \mu\text{mol kg}^{-1}$  between latitude  $23^\circ \text{S}$  and  $32^\circ \text{S}$  and at longitude  $175^\circ \text{E}$  (P14C section in Fig. 12b, Fig. S2). At latitude  $30^\circ \text{S}$  and between longitude  $150^\circ \text{E}$  and  $180^\circ \text{E}$  in the Tasman Sea and north of New Zealand,  $\text{N}^*$  signal was  $0.66 \pm 0.46 \mu\text{mol kg}^{-1}$  (P06 section



in Fig. 12b, Fig. S2).  $N^*$  signal remained relatively high in the central part of the South Pacific between latitude  $23^\circ$  S and  $32^\circ$  S and longitude  $175^\circ$  E and  $135^\circ$  W, with a mean value of  $0.77 \pm 0.23 \mu\text{mol kg}^{-1}$  at longitude  $170^\circ$  W (P15 section) and  $0.29 \pm 0.14 \mu\text{mol kg}^{-1}$  at longitude  $135^\circ$  W (P16 section in Fig. 12b, Fig. S2). At latitude  $32^\circ$  S,  $N^*$  signal remained relatively stable between longitude  $180^\circ$  and  $120^\circ$  W with a mean value of  $0.34 \pm 0.27 \mu\text{mol kg}^{-1}$  between longitude  $180^\circ$  and  $150^\circ$  W and  $0.21 \pm 0.16 \mu\text{mol kg}^{-1}$  between longitude  $150^\circ$  W and  $120^\circ$  W (P06 section in Fig. 12b, Fig. S2). A drastic decrease of  $N^*$  signal was observed at longitude  $110^\circ$  W and at longitude  $85^\circ$ – $90^\circ$  W (P18, P19 sections in Fig. 12b, Fig. S2). At latitude  $32^\circ$  S the  $N^*$  signal dropped sharply to  $-3.51 \pm 2.72 \mu\text{mol kg}^{-1}$  at longitude  $90^\circ$  W and  $-17.33 \pm 2.63 \mu\text{mol kg}^{-1}$  between longitude  $84^\circ$  W and  $82^\circ$  W (P06 section in Fig. 12b, Fig. S2). South of latitude  $32^\circ$  S, on  $\sigma_{26.3}$  the  $N^*$  signal showed a positive anomaly with a mean value of  $0.29 \pm 0.55$  (P15 section in Fig. 12b, Fig. S2) and became predominantly negative between longitude  $150^\circ$  W and  $90^\circ$  W with an average value of  $-0.62 \pm 0.33 \mu\text{mol kg}^{-1}$ ,  $-0.69 \pm 0.76 \mu\text{mol kg}^{-1}$  and  $-0.71 \pm 0.35 \mu\text{mol kg}^{-1}$  respectively at longitude  $135^\circ$  W,  $110^\circ$  W and  $90^\circ$  W (P16, P18, P19 sections in Fig. 12b, Fig. S2).

#### 4. Discussion

##### 4.1 Sharp increase of $N^*$ in surface waters of the MA

A positive  $N^*$  anomaly for all the stations, with minimum values ( $\approx 0.59 \pm 0.24 \mu\text{mol L}^{-1}$ ) in the GY waters and maximum values ( $\approx 1.64 \pm 0.50 \mu\text{mol L}^{-1}$ ) in the SW of the MA was observed (Fig. 10b). A difference of  $1.05 \pm 0.37 \mu\text{mol L}^{-1}$  was observed between MA and GY surface waters. Several factors may explain this difference.

##### 4.1.1 Nitrogen supply and $\text{PO}_4^{3-}$ uptake by $\text{N}_2$ fixing organisms in the SW of the MA

A low concentration of  $\text{NO}_3^-$  characteristic of oligotrophic environment was observed in the upper water of the gyre. Deutsch et al. (2007) suggested that waters deficient in  $\text{NO}_3^-$  were a favorable environment for  $\text{N}_2$  fixation by probably limiting interspecific competition and favoring organisms adapted physiologically to nitrogen-deficient environments. Although the absence of  $\text{NO}_3^-$  in the SW of the gyre is a necessary condition for  $\text{N}_2$  fixation, this did not seem sufficient to stimulate  $\text{N}_2$  fixation. The average  $\text{PO}_4^{3-}$  concentrations are higher in the SW of the GY ( $\text{PO}_4^{3-}{}_{\text{obs(GY)}} = 0.05 \pm 0.02 \mu\text{mol L}^{-1}$ ) than in the SW of the MA ( $\text{PO}_4^{3-}{}_{\text{obs(MA)}} = 0.08 \pm 0.03 \mu\text{mol L}^{-1}$ ), where concentrations in  $\text{PO}_4^{3-}$  are almost depleted. On the other hand, the variability of  $\text{PO}_4^{3-}$  between the surface MA's waters and of that of the GY ( $\Delta\text{PO}_4^{3-}{}_{\text{estimated}}$ ), associated with the difference of  $\text{NO}_3^-$  in excess ( $\Delta\text{N}^*$ ), were  $-0.07 \pm 0.03 \mu\text{mol L}^{-1}$  and are of the same order of magnitude as the variations of  $\text{PO}_4^{3-}$  observed between both regions ( $\Delta\text{PO}_4^{3-}{}_{\text{observed}} = -0.07 \pm 0.01 \mu\text{mol L}^{-1}$ ). If in the SW, the  $\text{N}^*$  variations are solely due to the diazotrophic activity, these results suggest that the decrease in  $\text{PO}_4^{3-}$  and the associated increase in  $\text{N}^*$  in the MA waters are controlled by diazotrophic organisms. The high concentrations of  $\text{PO}_4^{3-}$  in the SW of the GY suggest a low use by diazotrophs, as  $\text{N}_2$  fixation is hypothesized to be limited by dissolved iron (DFe) availability in GY waters (Moutin et al., 2008; Bonnet et al., this issue) maintaining a low  $\text{N}^*$  anomaly in this region. The availability of  $\text{PO}_4^{3-}$  was suggested to control  $\text{N}_2$  fixation in the WTSP (Moutin et al., 2005; Moutin et al., 2008) which may explain that  $\text{N}^*$  signal intensity may be limited by the availability of  $\text{PO}_4^{3-}$  in this oceanic area. The  $\text{N}_2$  fixation gradient observed during the OUTPACE cruise (Bonnet et al., this issue) is likely related to higher DFe availability in the SW of the MA (Guieu et al., under review) and much lower concentrations in the eastern SW of the GY, which are among the lowest reported in the global ocean (Blain et al., 2008). Our results support those of Deutsch et al. (2001), who initially suggested that the high  $\text{N}^*$  values observed in the SW in the WTSP near Australia are due to significant  $\text{N}_2$  fixation in this region (Messer et al., 2016; Bonnet et al., 2015), before proposing higher  $\text{N}_2$  fixation rates in the GY (Deutsch et al., 2007). The higher DFe availability coupled with an absence of  $\text{NO}_3^-$  in the SW of the MA could stimulate the diazotrophic activity, which in turn will introduce excess nitrogen, deplete the SW in  $\text{PO}_4^{3-}$  and be the explanation for the positive  $\text{N}^*$  anomaly in the MA waters.



#### 4.1.2 Excess nitrogen supply via remineralization of diazotrophic organic material

400 Direct POM measurements showed significant accumulation of particles in the SW and attenuation at the top of the UTW (Fig. 7a, 7b). Despite extremely low nutrient concentrations, a significant amount of POM was measured in particular for the MA stations with PON and POP concentrations reaching 1.175 and 0.057  $\mu\text{mol L}^{-1}$  in the SW, respectively. Typical PON concentrations generally measured in oligotrophic regions are lower than 0.6  $\mu\text{mol L}^{-1}$  (Martini et al., 2013). The observed values, particularly at station LD B, are only slightly less than those measured in the Low-Nutrient-High-Chlorophyll (LNHC) zones of northern latitudes (Sarmiento and Gruber, 2006), which generally have a lower limit of 1  $\mu\text{mol L}^{-1}$  in PON (Martini et al., 2013). PON:POP ratios averaged over the entire water column are very close to the RR, except for the most productive zones located in the MA, which have an excess of PON compared to POP, in particular at the top of SW (Fig. 8). This excess of PON can be as high as 0.370  $\mu\text{mol L}^{-1}$  compared to RR, the undetectable  $\text{NO}_3^-$  concentrations, forming an external nitrogen supply to the system that can support organic production. Organic matter contained in diazotrophic organisms is naturally enriched in nitrogen relative to phosphorus with a PON:POP ratio of up to 125 (Karl et al., 1992). Nevertheless, the stoichiometric PON:POP ratios observed during the OUTPACE cruise are much lower, with a maximum of 25.3 observed at station LD B. This difference could be explained because PON:POP ratio of 125 observed by Karl et al. (1992) is an exceptionally high value related to an intense bloom that probably does not reflect the general relationships associated with diazotrophs growth. Letelier and Karl (1998) observed mean ratios associated with *Trichodesmium* sp. diazotrophs between 40 and 50, which nevertheless remains much higher than the observations made during the OUTPACE cruise. Most studies reporting extremely high ratios were carried out either in the North Pacific Gyre (Karl et al., 1992), or in the Atlantic (Hansell et al., 2004), the WTSP remaining to date an under-sampled region. Oligotrophic gyres in the northern hemisphere have lower concentrations of  $\text{PO}_4^{3-}$  than those measured in the southern hemisphere (Moore et al., 2013). Since the cellular stoichiometry of organisms is a function of nutrient availability (Karl et al., 2002),  $\text{PO}_4^{3-}$  deficiency largely higher in the MA than in the GY (Moutin et al., this issue) may explain the higher PON:POP ratios in the northern hemisphere than in the WTSP. Finally, according to Mulholland et al. (2001), the more or less significant amount of nitrogen associated with diazotrophic biomass can after mineralization in the productive layer eventually be at the origin of the establishment of a particular food web. The occurrence of diazotrophs and the associated nitrogen supply would allow the concomitant development of non-diazotrophic phytoplankton and zooplankton (Mulholland et al., 2007). A much more intensive pattern of diatom development has been observed in MA waters (Brunet, 2016, pers. comm.). It is generally accepted that diatoms are characterized by a low PON:POP ratio (Moore et al., 2013), which could contribute to reducing the observed PON excess in comparison with the ratios measured by Karl et al. (1992) and Letelier and Karl (1998).

On an annual time scale, the strong anomalies face  $\text{N}^*$  can be explained, on the one hand by the formation of diazotrophic organic matter, which together with the fixation of  $\text{N}_2$  reduces the stock of  $\text{PO}_4^{3-}$  and positively influences the  $\text{N}^*$  signal. On the other hand, part of the excess of PON which goes after remineralization towards the stock of fixed nitrogen therefore also positively influence the  $\text{N}^*$  signal. These results corroborate those of Yoshikawa et al. (2015) who suggest that nitrogen supply by remineralization of diazotroph biomass and consumption of  $\text{PO}_4^{3-}$  by nitrogen fixers induces an excess of nitrogen in the WTSP east of 160°E. Nevertheless, Benavides and Voss (2015) point out that the  $\text{N}^*$  signal could be overestimated by nitrogen inputs that are not attributable to the diazotrophic process, such as: mineralization of non-diazotrophic organisms with a high PON:POP ratio, lateral advection of DOM with a high DON:DOP ratio (Loetscher et al., 2013), and atmospheric nitrogen input. Although atmospheric deposition of fixed nitrogen has tripled in the ocean since 1860 (Moore et al. 2013), atmospheric fluxes in the waters of the MA and the GY remain low (Caffin et al., this issue; Wagener et al. 2008). The  $\text{N}^*$  signal showed a significant difference between the thermocline waters of the MA and the one of the GY. As highlighted by Deutsch et al. (2001), the uptake of  $\text{PO}_4^{3-}$  by diazotrophic organisms no longer occurs and therefore will have no impact on the  $\text{N}^*$  signal. In the thermocline waters of the MA, the variability of  $\text{N}^*$  may be caused by remineralization, Redfieldian or

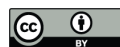

not, of organic matter and/or by the circulation and mixing of waters masses. The results showed that UTW are a preferential remineralization zone, marked by increasing AOU values (Fig. 4b) and a significant attenuation of POM concentrations (Fig. 7a, 7b). One of the possible hypotheses that might explain the positive anomaly of  $N^*$  in the thermocline waters observed in the MA is the nitrogen supply by remineralization of excess PON. The decrease of the  $N^*$  anomaly in the thermocline waters of the GY can be explained in various ways:  $N_2$  fixation rates (Fig. 4d) and associated excess PON being almost zero (Fig. 7, Fig. 8), it is likely that the remineralization process has no or very little impact on the  $N^*$  anomaly. These results can partly explain the weak anomaly observed. The concept of  $N^*$  reveals its full complexity in the thermocline waters. Indeed, as pointed out by Deutsch et al. (2001), signal coupling between denitrification regions and  $N_2$  fixation regions should be considered in the interpretation of the local  $N^*$  signal, which is due to  $N_2$  fixation and the mixing process undergone by a water parcel.

#### 4.2 The WTSP, a source of excess nitrogen for the thermocline waters of the South Pacific

From a biogeochemical point of view, the thermocline waters are of a crucial importance in the global ocean thermocline waters, the spatial distribution and concentration gradient of  $N^*$  reflects the global distribution of  $N_2$  fixation and denitrification (Gruber and Sarmineto, 1997; Hansell et al., 2004; Deutsch and Weber, 2012). At the global ocean scale, calculation of  $N^*$  signal from the new GLODAPv2 database showed a strong spatial decoupling between the thermocline waters of the ETSP and those of the WTSP. A strongly positive  $N^*$  anomaly was observed in the thermocline waters of the WTSP in the Coral and Tasman Seas. Conversely, the OMZ region was marked by a strong negative  $N^*$  anomaly.

##### 4.2.1 Westward transport of the negative $N^*$ signal

This negative  $N^*$  anomaly increased with water subduction centered on  $\sigma_{24.7}$  in the central Pacific ( $18^\circ$ – $20^\circ$  S,  $100^\circ$ – $150^\circ$  W, Fig. 12a, Fig. S1). Donguy and Henin (1977) showed that in the South Pacific between longitude  $170^\circ$  W and  $110^\circ$  W and latitude  $20^\circ$  S, surface waters have a salinity and a temperature greater than 36.8 and  $26^\circ$  C, respectively. These surface and subsurface waters sink with a subduction rate of 6–7 Sv around the Polynesian region near the Societies islands ( $12^\circ$ – $25^\circ$  S;  $100^\circ$ – $150^\circ$  W) (O'Connor et al. 2002; Fiedler and Talley, 2006) under the lighter and less salty surface waters produced by an excess of precipitation over evaporation in the West. This water masse is named Northern component of Subtropical Lower Water (SLW) (Wyrki, 1962a; Solokov and Rintoul, 2000) or the South Pacific Equatorial Water (SPEW) (Donguy and Henin, 1977; Emery and Meincke, 1986; Tomczak and Hao, 1989; Donguy, 1994) and had a density between 24.4 and 24.8 and a high salinity ( $>35.7$ ) in the Coral Sea. Tomczak and Hao, (1989) and Solokov and Rintoul, (2000) showed that SLW (or SPEW) was transported eastward from the central part of the Pacific and had a strong influence on the water masses in the Coral Sea and the Solomon Sea. Solokov and Rintoul, (2000) showed that SEC transport 55 Sv toward the Coral Sea, with a transport concentrated in the upper thermocline. These authors concluded that the northern arm of the SEC transport a salty, warm and lower oxygen water in the north of  $16^\circ$  S between Solomon and Vanuatu Islands and the southern branch of the SEC transport a less salty, less warm and more oxygen water in the south of  $16^\circ$  S between Vanuatu and New Caledonia. From OUTPACE data and the new GLODAPv2 database, our results showed that the high salinity centered on  $\sigma_{24.7}$  (Fig. 4a) is associated with a negative  $N^*$  anomaly which gradually increased from the central Pacific towards the OUTPACE region (Fig. 12a). We also found in the WTSP a front, with a strong negative  $N^*$  anomaly in the north of  $15^\circ$  S observed on P14C, P15 sections and cruise (20), and a sharp increase of  $N^*$  signal in the south of  $15^\circ$  S observed on P21, P14C, P15, and OUTPACE sections, (Fig. 12a).

The increase in  $N^*$  (or decrease in  $P^* = PO_4^{3-} - NO_3^- / 16$ , Deutsch et al. 2007) towards the centre of the gyre corresponded to the trend observed by Deutsch et al. (2001; 2007) and Moutin et al. (2008). It has been shown that the thermocline waters and more particularly those located at the depth of the  $\sigma_{26.3}$  (Fig. 12b) will be also the seat of variations signal induced by the preferential transport through the SEC of the strongly negative  $N^*$  anomaly from the OMZ in the ETSP. Deutsch et al.

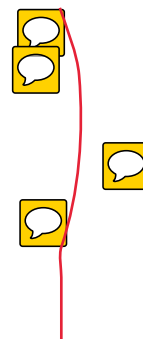



(2001) showed that  $N^*$  values below  $-4 \mu\text{mol kg}^{-1}$  were visible up to longitude  $150^\circ \text{W}$  in the South Tropical Pacific despite oxygen concentrations excluding any denitrification process. These results suggest that the local  $N^*$  signal on OUTPACE section reflects the combined effect of remineralization nitrogen supply and mixing processes with the strongly negative  $N^*$  anomaly from OMZ.

#### 4.2.2 Eastward transport of the positive $N^*$ signal

In the WTSP, the positive  $N^*$  signal observed on  $\sigma_{24.7}$  and  $\sigma_{26.3}$  south of  $15^\circ \text{S}$  can be explained by the high levels of  $N_2$  fixation observed in this region. Bonnet et al. (2017) combined the  $N_2$  fixation measurements from 6 cruises in the WTSP (including OUTPACE cruise) and concluded for a spot of  $N_2$  fixation in this region, consistent with the sharp increase of  $N^*$  in the thermocline waters of the Coral Sea in the WTSP (Fig. 12a, 12b, Fig. S2).

In the south of the Coral Sea and in the Tasman Sea between Australia and New Zealand and north of latitude  $40^\circ \text{S}$ , the  $N^*$  signal was positive in the lower thermocline water (Fig. 12b). Solokov and Rintoul, (2000) showed that in the south of latitude  $25^\circ \text{S}$  on P11 section (Fig. 3), the lower thermocline water was supplied by the lighter, northern variety of SLW described above which were characterized by an excess nitrogen on  $\sigma_{24.7}$ . The northern SLW outcropped in Winter in the central Tasman Sea and were converted into at the dense southern variety of SLW (Solokov and Rintoul, 2000). In the Tasman Sea, there was an eastward flow in a band between  $22^\circ \text{S}$  and  $27^\circ \text{S}$  (Wyrski, 1962). The EAC separated from the coast near  $30^\circ \text{S}$  into a series of filament-like eastward flows in the Tasman Sea (Ridgway and Dunn, 2003) and transport 30 Sv of SLW (Solokov and Rintoul, 2000). We hypothesize that the positive  $N^*$  signal observed in the thermocline waters of the Tasman Sea could reflect the southern and then eastern transport via the EAC recirculation (Fig. 2b) (Stramma et al., 1995; Wijffels et al., 2001) of the positive  $N^*$  signal observed in the MA waters and in the Coral Sea (Fig. 12).

Our results showed that the  $N^*$  signal was positive in the thermocline waters of the entire South Pacific between latitude  $23^\circ \text{S}$  and  $32^\circ \text{S}$  and up to longitude  $100^\circ \text{W}$ . On P06-2009 section ( $32^\circ \text{S}$ ,  $150^\circ \text{E}$ - $80^\circ \text{W}$ , Fig. 3), the  $N^*$  signal remained relatively high and stable on  $\sigma_{26.3}$ . A sharp decrease of the  $N^*$  signal was observed in the easternmost part of the basin at longitude  $80^\circ$ - $90^\circ \text{W}$  (Fig. 12b). This trend is also observed for sections P06-1992 and P06-2003 (Fig. S5e, Fig. S5f). Indeed, Solokov and Rintoul, (2000) suggest that ventilated SLW carried eastward by the EAC spread around the subtropical gyre of the South Pacific. From a linear inverse model combined with P06 cruise data, Wijffels et al. (2001) showed that 7 Sv of thermocline waters recirculate west to TKR (Fig. 2a) and that the thermocline flow is predominantly zonal between  $177^\circ \text{W}$  and  $125^\circ \text{W}$ . These results suggest, on the one hand, that the denitrified waters in the southern part of the OMZ ( $30^\circ$ - $32^\circ \text{S}$ ,  $80^\circ \text{W}$ ) remained confined in the eastern part of the Pacific. On the other hand, the southern branch of the subtropical gyre (Fig. 2b) was probably the main vector of excess nitrogen transport in the thermocline waters of the South Pacific.

510

#### 4.2.3 Spatial decoupling between N sources and sinks in the South Pacific?

Deutsch et al. (2007) hypothesized from a biogeochemical model coupled with ocean circulation that a geographically close spatial coupling exists between zones of high denitrification and zones of high  $N_2$  fixation. Gruber (2016) still confirms using an inverse modeling approach the hypothesis of Deutsch et al. (2007) that the coupling between denitrification and  $N_2$  fixation would be spatially narrow, and concludes that  $N_2$  fixation rates of the order of  $500 \mu\text{mol N m}^{-2} \text{d}^{-1}$  are present near the Chilean coast ( $80^\circ$ - $100^\circ \text{W}$ ). The model results also showed  $N_2$  fixation rates of the order of 280 to  $400 \mu\text{mol N m}^{-2} \text{d}^{-1}$  in the subtropical gyre between  $100^\circ \text{W}$  and  $160^\circ \text{W}$  despite the fact that recent fixation measurements in the central and eastern part of the subtropical Pacific showed very low levels of  $N_2$  fixation (Bonnet et al., 2017).

In the ETSP and the South Pacific gyre, between longitude  $80^\circ \text{W}$  and  $100^\circ \text{W}$  and latitude  $20^\circ \text{S}$ , Ikenmaker et al. (2013) measured  $N_2$  fixation rates between 0 and  $148 \mu\text{mol N m}^{-2} \text{d}^{-1}$ , while Knapp et al. (2016) measured a  $N_2$  fixation rate between 0 and  $23 \mu\text{mol N m}^{-2} \text{d}^{-1}$ . Moutin et al. (2008) also report extremely low  $N_2$  fixation rates ( $\approx 0.12 \text{ nmol N L}^{-1} \text{d}^{-1}$ ).





subtropical gyre waters and extremely low  $N_2$  fixation rates were measured in the SW of the GY during the OUTPACE cruise (4.79–72.53  $\mu\text{mol N m}^{-2} \text{d}^{-1}$ ) (Fig. 11).

525 Currently there is therefore a clear disagreement between the model results, in situ data and geochemical calculation. Indeed, according to the first results, it seems that the spatial coupling between the strong denitrification zones and the strong  $N_2$  fixation zones could exist. Nevertheless, extremely high  $N_2$  fixation rates in the MA waters (Fig. 4d, Fig. 11), as well as the positive  $N^*$  signal observed in the thermocline waters of the Coral and Tasman seas and in the southern part of the basin (Fig. 12, Fig. S2) suggest that the spatial coupling would occur at the basin scale through the westwards and eastward transport of the SEC, the EAC and finally of the SPC between a High Iron/High Nitrogen/High Phosphate (HI-HN-HP) zone in the eastern part and a High Iron/Low Nitrogen/Low Phosphate (HI-LN-LP) zone in the western part of the subtropical Pacific. As hypothesized by Bonnet et al. (2017) and Moutin et al. (this issue), the spatial coupling could thus be spatially more distant than predicted by Deutsch et al. (2007) and Gruber (2016).

535 If the  $N_2$  fixation was elusive GY, how will it be possible to explain the increase in  $N^*$  signal of the thermocline waters during their westward transport by the northern branch of the SEC between latitude  $5^\circ \text{S}$  and  $23^\circ \text{S}$ . Moutin et al. (2008) argued that  $N_2$  fixation is not the only process driving the increase in  $N^*$  (or decrease in  $P^*$ ), and hypothesize that the export of material with a N:P ratio lower the RR could be at the origine of  $N^*$  increase. Wijffels et al. (2001) suggested that on P06 transect west of TKR, the thermocline waters were subject to a serie of energetic northward recirculation and that the main northward flow on the thermocline waters (0–1000 m) is found between  $125^\circ \text{W}$  and  $80^\circ \text{W}$ . We hypothesize that the nitrogen excess observed on  $\sigma_{26.3}$  in the WTSP is advected from the Tasman sea first eastward and then northward in the circulation of the gyre and could influence positively the thermocline waters of the South Pacific being thus at the origin of the westward increase of the strongly negative  $N^*$  signal transported by the SEC. The northward transport of the positive  $N^*$  signal could be more pronounced on the one hand in the west of the TKR and on the other hand in the eastern part of the South Pacific.

540 This  $N^*$  study in the thermocline waters of the South Pacific is based on all cruises data available in the GLODAPv2 database updated in 2014 using datasets that have occurred at different seasons and years and thus not taking into account seasonal and interannually variability in  $N^*$  interpretation is questionable. Nevertheless, we found the same pattern from the cruises which have been repeated several times at the same location in different seasons and years (Table S1, Fig. S4, Fig. S5). A strong negative  $N^*$  signal was observed on  $\sigma_{24.7}$  and  $\sigma_{26.3}$  roughly between latitude  $5^\circ \text{S}$  and  $20^\circ$ – $23^\circ \text{S}$  and a positive  $N^*$  signal was observed in the WTSP and in the southern part of the basin roughly between latitude  $23^\circ \text{S}$  and  $32^\circ \text{S}$  (Fig. S4, Fig. S5).

## Conclusions

545 As part of the OUTPACE cruise ( $160^\circ \text{E}$ – $160^\circ \text{W}$ ,  $18^\circ$ – $20^\circ \text{S}$ ), changes in  $N^*$  signal, a tracer to visualize the combined effect of denitrification and diazotrophy on nitrogen variations, were examined in the WTSP. We revealed the presence of two oceanic regions that are quite distinct from a biogeochemical point of view. On the one hand, the waters located in the Melanesian Archipelago ( $160^\circ \text{E}$ – $170^\circ \text{W}$ ) have a deficit of  $\text{NO}_3^-$  and  $\text{PO}_4^{3-}$  in the productive layer (0–100 dbar), an excess of PON relative to POP associated in part with diazotrophic POM formation, and a positive  $N^*$  anomaly in surface and thermocline waters. This nitrogen excess over  $\text{PO}_4^{3-}$  measured in the waters of the MA was observed in parallel with records rates of  $N_2$  fixation. On the other hand, the surface waters of the South Pacific Gyre ( $170^\circ \text{W}$ – $160^\circ \text{W}$ ) are characterized by  $\text{NO}_3^- < \text{QL}$ , significant  $\text{PO}_4^{3-}$  concentrations, a lack of PON in excess and a  $N^*$  anomaly close to zero or negative. Despite the high concentrations of  $\text{PO}_4^{3-}$  in surface waters, the  $N_2$  fixation rates are close to zero in the South Pacific Gyre suggesting a limitation by DFe availability, and preventing  $N^*$  signal increase.

550 At the basin scale, the analysis from the recent GLODAPv2 dataset (Olsen et al. 2016) highlights a strong spatial decoupling between the thermocline waters of the ETSP and those of the WTSP. A strong positive  $N^*$  anomaly is observed in the





thermocline waters of the WTSP in the Coral and Tasman Seas and in the southern part of the South Pacific, roughly between 23° S and 32 °S. We hypothesize that the southern branch of the subtropical gyre is ~~probably~~ the main vector of excess nitrogen transport in the thermocline waters of the South Pacific.

Finally, the N<sub>2</sub> fixation ~~flux~~ observed at the surface and the N\* signal observed in the thermocline waters of the OUTPACE section showed a similar spatial trend. Nevertheless, the extraction of quantitative information as a budget at the regional scale from N\* is not possible directly since it requires to subtract all the effects attributable to the diazotrophic activities. To do so, a precise description of the general and mesoscale circulation of water masses, accompanied by a detailed knowledge of their origins, their properties during formation and their mixing is needed. Only few cruises have occurred in the South Pacific Ocean and, unlike in the Atlantic Ocean, nomenclature, formation processes, circulation and mixing of water masses are still subject to debate and make interpretation from N\* signal at regional scale yet difficult. Further work is required to explore different unsolved points.

## Acknowledgements

This is a contribution of the OUTPACE (Oligotrophy from Ultra-oligoTrophy PACific Experiment) project (<https://outpace.mio.univ-amu.fr/>) funded by the French research national agency (ANR-14-CE01-0007-01), the LEFE-CyBER program (CNRS-INSU), the GOPS program (IRD) and the CNES (BC T23, ZBC 4500048836). The OUTPACE cruise (<http://dx.doi.org/10.17600/15000900>) was managed by MIO (OSU Institut Pytheas, AMU) from Marseilles (France) and received funding from European FEDER Fund under project 1166-39417. The authors thank the crew of the RV *L'Atalante* for outstanding shipboard operations. G. Rougier and M. Picheral are warmly thanked for their efficient help in CTD rosette management and data processing, as well as C. Schmechtig for the LEFE-CyBER database management. All data and metadata are available at the following web address: <http://www.obs-vlfr.fr/proof/php/outpace/outpace.php>. The authors would like to acknowledge all the voyages leaders, participants and crew involved in the Global Ocean Data Analysis Project version 2 that were used in this study.

## References

- Aminot, A., Kérouel, R.: Dosage automatique des nutriments dans les eaux marines : méthodes en flux continu, Ed. Ifremer, Méthodes d'analyse en milieu marin, 188p, 2007.
- Anderson, L.A.: On the hydrogen and oxygen content of marine phytoplankton, *Deep Sea Research*, 42, 9, 1995.
- Benavides, M. and Voss, M.: Five decades of N<sub>2</sub> fixation research in the North Atlantic Ocean, *Frontiers in Marine Science*, 2, 2015.
- Benschneider, K. and Robinson, R.J.: A new spectrophotometric method for determination of nitrite in the sea water, *Journal of Marine Research*, 11, 87-96, 1952.
- Blain S., Bonnet S., and Gieu, C.: Dissolved iron distribution in the tropical and sub tropical South Eastern Pacific, *Biogeosciences*, 5, 269-270, 2008.
- Bonnet, S., Caffin, M., Berthelot, H., and Moutin, T.: Hot spot of N<sub>2</sub> fixation on the western tropical South Pacific pleads for a spatial decoupling between N<sub>2</sub> fixation and denitrification, *PNAS*, 114,14, 2017.
- Bonnet, S., Rodier M., Turk-Kubo Kendra, A., Germineaud, C., Menkès, C.E., Ganachaud, A., Cravatte S., Raimbault, P., Campbell, E., Quéroùé, F., Sarthou, G., Desnues, A., Maes, C., and Eldin, G.: Contrasted geographical distribution of N<sub>2</sub> fixation rates and *nifH* phylotypes in the Coral and Solomon Seas (southwestern Pacific) during austral winter conditions, *Global Biogeochemical Cycles*, 29, 1874-1892, 2015.

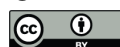

- Bonnet, S., Biegala, I., Dutrieux, P., Slemmons, L., and Capone D.G.: Nitrogen fixation in the western equatorial Pacific: Rates, diazotrophic cyanobacterial size class distribution, and biogeochemical significance, *Global Biogeochemical Cycles*, 23, 1-13, 2009.
- 605 Bonnet S., Caffin C., Berthelot H., Grosso O., Benavides M., Hélias, S., Moutin T., Guieu C., and Rachel Foster, R.: In depth characterization of diazotroph activity across the Western Tropical South Pacific hot spot of N<sub>2</sub> fixation, *Biogeosciences*, this issue.
- Broecker, W. S. and Peng, T.H.: Tracers in the Sea, Eldigio, Lamont-Doherty Geol. Obs., Palisades, N.Y., 1982.
- Broecker, W. S.: 'NO', a conservative water-mass tracer, *Earth Planet. Sci. Lett.*, 23, 100-107, 1974.
- 610 Caffin, M., Moutin, T., Foster, R.A., Bouruet-Aubertot, P., Doglioli, M.D., Berthelot, H., Helias-Nunige, S., Leblond, N., Gimenez, A., Petrenko, A.A., de Verneil, A., and Bonnet, S.: Nitrogen budgets following a Lagrangian strategy in the Western Tropical South Pacific Ocean: the prominent role of N<sub>2</sub> fixation (OUTPACE cruise), *Biogeosciences*, this issue.
- Capone, D.G., Burns, J.A., Montoya, J.P., Subramaniam, A., Mahaffey, C., Gunderson, T., Michaels A.F., and Carpenter, E.: Nitrogen fixation by *Trichodesmium* spp.: An important source of new nitrogen to the tropical and subtropical North Atlantic Ocean, *Global Biogeochemical Cycles*, 19, 2005.
- 615 Carrit, D.E. and Carpenter, J.H.: Comparaison and evaluation of currently employed modifications of the Winkler method for determining dissolved oxygen in the sea water, *Limnology and Oceanography*, 24, 286-318, 1966.
- Carpenter, J.H.: The accuracy of the Winkler method for dissolved oxygen analysis, *Limnology and Oceanography*, 10, 135-140, 1965.
- 620 Church, J. A.: East Australian Current adjacent to the Great Barrier Reef. *Aust. Journal of Marine Freshwater Research*, 38, 671-683, 1987.
- Codispoti, L.A. and Richards, F.A.: Analysis of Horizontal Regime of Denitrification in Eastern Tropical North Pacific, *Limnology and Oceanography*, 21, 379-388, 1976.
- Culberson, C.H., Knapp, G., Williams, R.T., and Zemlyak, F.: A comparison of methods for the determination of dissolved oxygen in seawater, *WOCE Report*, 73, 1991.
- 625 Dekaezemacker, J., Bonnet, S., Grosso, O., Moutin, T., Bressac, M., and Capone, D.G.: Evidence of active dinitrogen fixation in surface waters of the eastern tropical South Pacific during El Nino and La Nina events and evaluation of its potential nutrient controls, *Global Biogeochemical Cycles*, 27, 2013.
- Deutsch, C. and Weber, T.: Nutrient Ratios as a Tracer and Driver of Ocean Biogeochemistry, *Annual Review of Marine Science*, 41, 4-113, 2012.
- 630 Deutsch, C., Sarmiento, J.L., Sigman, D.M., Gruber, G., and Dunne, J.P.: Spatial coupling of nitrogen inputs and losses in the ocean, *Nature*. 115, 2007.
- Deutsch, C., Gruber, N., Key, R., and Sarmiento, J.L.: Denitrification and N<sub>2</sub> fixation in the Pacific Ocean, *Global Biogeochemical Cycles*, 15, 2, 2001.
- 635 De Verneil, A., Rousselet, L., Doglioli, A.M., Petrenko, A.A., and Moutin, T.: The Fate of a Southwest Pacific Bloom: Gauging the impact of submesoscale vs. mesoscale circulation on biological gradients in the subtropics, *Biogeosciences Discussion*, 2017.
- Dickson, A. G.: Determination of dissolved oxygen in sea water by Winkler titration, *WOCE operations manual*, WHP operations and methods, WHPO 91-1, WOCE Rep. 68/91, WOCE International Project Office, 13 pp, 1996.
- 640 Donguy, J. R.: Surface and subsurface salinity in the tropical Pacific Ocean. Relations with climate, *Progress in Oceanography*, 34, 45-78, 1994.
- Donguy, J. R. and Henin, C.: Origin of the Surface Tropical Water in the Coral and Tasman Seas, *Aust. J. Mar. Freshwater Res.*, 28, 321-332, 1977.

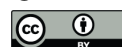

- Dugdale, R. C. and Goering, J. J.: Uptake of new and regenerated forms of nitrogen in primary productivity, *Limnology and Oceanography*, 12, 2, 196-206, 1967.
- Emery W.J., and Meincke., J.: Global water masses: summary and review, *Oceanologica Acta*, 9,4, 1986.
- Fiedler, P. C. and Talley. L.D.: Hydrography of the eastern tropical Pacific: A review, *Progress in Oceanography*, 69, 143-180, 2006.
- Gasparin, F., Maes, C., Sudre, J., Garcon, V., and Ganachaud, A.: Water mass analysis of the Coral Sea through an Optimum Multiparameter method, *Journal of Geophysical Research Oceans*, 119, 7229-7244, 2014.
- Guieu, C., Bonnet, S., Petrenko, A.A., Menkes, C., Chavagnac, V., Desboeufs, K., Maes, C., and Moutin, T. Iron from a submarine source impacts the productive layer of the Western Tropical South Pacific (WTSP). *Nature Sci. Rep.* (in revision).
- Gourdeau, L., Kessler, W.S., Davis, R.E., Sherman, J., Maes, C., and Kestenare, E.: Zonal jets entering the Coral Sea, *Journal of Physical Oceanography*, 38, 714-724, 2008.
- Gruber, N. and Sarmiento, J.L.: Global patterns of marine nitrogen fixation and denitrification, *Global Biogeochemical Cycles*, 11, 2, 235-266, 1997.
- Gruber, N.: Elusive marine nitrogen fixation. *PNAS*, 113, 16, 4246-4248, 2016.
- Hansell, D.A., Bates, N.R., and Olson, D.B.: Excess nitrate and nitrogen fixation in the North Atlantic Ocean, *Marine Chemistry*, 84, 243-265, 2004.
- Jickells, T.D., Buitenhuis, E., Altieri, K., Baker, A.R., Capone, D., Duce, R.A., Dentener, F., Fennel, K., Kanakidou, M., LaRoche, J., Lee, K., Liss, P., Middelburg, J. J., Moore, J.K., Okin, G., Oschlies, A., Sarin, M., Seitzinger, S., Sharples, J., Singh, A., Suntharalingam, P., Uematsu, M., and Zamora, L.M.: A re-evaluation of the magnitude and impacts of anthropogenic atmospheric nitrogen inputs on the ocean, *Global Biogeochemical Cycles*, 31, 289-305, 2017.
- Karl, D.M., Letelier, R., Hebel, D.V., Bird, D.F., and Winn, C.D.: Trichodesmium blooms and new nitrogen in the north Pacific gyre. In: Carpenter EJ, Capone DG & Rueter JG (Eds) *Marine Pelagic Cyanobacteria: Trichodesmium and other Diazotrophs*, Kluwer Academic Publishers, The Netherlands, 219–237, 1992.
- Karl, D., Michaels, A., Bergman, B., Capone, D., Carpenter, E., Letelier, R., Lipschultz, F., Paerl, H., Sigman, D., and Stal, L.: Dinitrogen fixation in the world's oceans, *Biogeochemistry*, 58, 47-98, 2002.
- Kessler, W. S. and Cravatte. S.: Mean circulation of the coral sea, *J. Geophys. Res. Oceans*, 118, 6385–6410, 2013a.
- Key, R. M., Kozyr, A., Sabine, C. L., Lee, K., Wanninkhof, R., Bullister, J. L., Feely, R. A., Millero, F. J., Mordy, C., and Peng, T.-H.: A global ocean carbon climatology: Results from Global Data Analysis Project (GLODAP), *Global biogeochemical Cycles*, 18, GB4031, 2004.
- Key, R. M., Tanhua, T., Olsen, A., Hoppema, M., Jutterström, S., Schirnick, C., van Heuven, S., Kozyr, A., Lin, X., Velo, A., Wallace, D. W. R., and Mintrop, L.: The CARINA data synthesis project: introduction and overview, *Earth System Science Data*, 2, 105–121, 2010.
- Knapp, A.N., Casciotti, K.L., Berelson, W.M., Prokopenko, M.G. and Capone. D.G.: Low rates of nitrogen fixation in the eastern tropical South Pacific surface waters, *PNAS*, 113, 16, 4398-4403, 2016.
- Letelier, R.M. and Karl, D.M.: Trichodesmium spp. Physiology and nutrient fluxes in the North Pacific subtropical gyre, *Aquatic Microbial Ecology*, 11, 265-276, 1998.
- Loescher, O., T., Hansell, D. A., Carlson, C. A., Lumpkin, R., and Knapp, A. N.: Dissolved organic nitrogen in the global surface ocean: distribution and fate *Global Biogeochemical Cycles*, 27, 141–153, 2013.
- Marchesiello. P and Middleton. J.H.: Modeling the East Australian Current in the Western Tasman Sea, *Journal of Physical Oceanography*, 30, 2956-2971, 2000.
- Martiny, A.C., Pham, C.T.A., Primeau, F.W., Vrugt, J.A., Moore, J.K., Levin, S.A., and Lomas, M.W.: Strong latitudinal patterns in the elemental ratios of marine plankton and organic matter, *Nature Geoscience*, 2013.



- Messer, L.F., Mahaffey, C., Robinson, C.M., Jeffries, T.C., Baker, K.G., Isaksson, J.B., Ostrowski, M., Doblin, M.A., Brown, M.V., and Seymour, J.R.: High levels of heterogeneity in diazotroph diversity and activity within a putative hotspot for marine nitrogen fixation, *The ISME journal*, 10, 1499-1513, 2016.
- McDougall, T.J., and Barker, P.M.: Getting started with TEOS-10 and the Gibbs Seawater (GSW) Oceanographic Toolbox, 28pp, SCOR/IAPSO WG127, ISBN 978-0-646-55621-5, 2011.
- 690 Michaels, A.F., Olson, D., Sarmiento, J.L., Ammerman, J.W., Fanning, K., Jahnke, R., Knap, A.H., Lipschultz, F., and Prospero, J.M.: Inputs, losses and transformations of nitrogen and phosphorus in the pelagic North Atlantic Ocean, *Biogeochemistry*, 35, 181-226, 1996.
- Montoya, J. P., Voss, M., Kahler, P., and Capone, D. G.: A Simple, High-Precision, High-Sensitivity Tracer Assay for N<sub>2</sub> Fixation, *Applied and environmental microbiology*, 62, 986-993, 1996.
- 695 Moore, C.M., Mills, M.M., Arrigo, K. R., Berman-Frank, I., Bopp, L., Boyd, P. W., Galbraith, E. D., Geider, R. J., Guieu, C., Jaccard, S. L., Jickells, T. D., La Roche, J., Lenton, T. M., Mahowald, N. M., Marañón, E., Marinov, I., Moore, J. K., Nakatsuka, T., Oschlies, A., Saito, M. A., Thingstad, T. F., Tsuda, A., and Ulloa, O.: Processes and patterns of oceanic nutrient limitation, *Nature Geoscience*, 6, 2013.
- 700 Moutin, T., Van Den Broeck, N., Beker, B., Dupouy, C., Rimmelin, P. and Le Bouteiller, A.: Phosphate availability controls trichodesmium spp. in the SW Pacific Ocean, *Marine Ecology*, 297, 15-21, 2005.
- Moutin, T., Karl, D.M., Duhamel, S., Rimmelin, P., Raimbault, P., Van Mooy, B.A.S. and Claustre, H.: Phosphate availability and the ultimate control of new nitrogen, *Biogeosciences*, 5, 95-109, 2008.
- Moutin, T., Doglioli, A.M., De Verneil, A., and Bonnet, S.: The Oligotrophy to the UITra Oligotrophy PACific Experiment (OUTPACE cruise, Feb. 18 to Apr. 3, 2015), *Biogeosciences Discuss*, 2017.
- 705 Moutin, T., Wagener, T., Caffin, M., Fumenia, A., Gimenez, A., Baklouti, M., Bouruet-Aubertot, P., Pujo-Pay, D. Leblanc, K., Lefevre, M., Helias Nunige, S., Leblond, N., Grosso, O. and de Verneil, A.: Nutrient availability and the ultimate control of the biological carbon pump in the Western Tropical South Pacific Ocean. *Biogeosciences* (this issue).
- Mulholland, M.R.: The fate of nitrogen fixed diazotrophs in the ocean, *Biogeosciences*, 4, 37-51, 2007.
- 710 Murphy, J., and Riley, J.: A modified single solution method for the determination of phosphate in natural waters, *Analytica chimica acta*, 27, 31-36, 1962.
- Naqvi, S.W. A., and Sen Gupta, R.: 'NO', a useful tool for the estimation of nitrate deficits in the Arabian Sea, *Deep Sea Research, Part A*, 32, 665-674, 1985.
- O'Connor, B.M., Fine, R.A., Maillet, K.A., and Olson, D.B.: Formation rates of subtropical underwater in the Pacific Ocean, *Deep Sea Research*, 40, 1571-1590, 2002.
- 715 Olsen, A., Key, R. M., van Heuven, S., Lauvset, S. K., Velo, A., Lin, X., Schirnack, C., Kozyr, A., Tanhua, T., Hoppema, M., Jutterström, S., Steinfeldt, R., Jeansson, E., Ishii, M., Pérez, F.F., and Suzuki, T.: The Global Ocean Data Analysis Project version 2 (GLODAPv2) – an internally consistent data product for the world ocean, *Earth System Science Data*, 8, 297–323, 2016.
- 720 Oschlies, A., and Garcon, V.: Eddy-induced enhancement of primary production in a model of the North Atlantic Ocean, *Nature*, 394, 266–269, 1998.
- Pujo-Pay, M. and Raimbault, P.: Improvement of the wet-oxidation procedure for simultaneous determination of particulate organic nitrogen and phosphorus collected on filters, *Marine Ecology Program Ser.*, 105, 203-207, 1994.
- Rafter, P.A., Sigman, D.M., Charles, C.D., Kaiser, J., and Haug, G.H.: Subsurface tropical Pacific nitrogen isotopic composition of nitrate: Biogeochemical signals and their transport, *Global Biogeochemical Cycles*, 26, 2012.
- 725 Redfield, A.C., Ketchum, B.H., and Richards, F.A.: The influence of organisms on the composition of seawater, in *The Sea* (Hill, M.N., Ed), 2, 26-77, Interscience, New York, 1963.



- Ridgway, K.R., and Dunn, J.R.: Mesoscale structure of the mean East Australia Current System and its relationship with topography, *Progress in Oceanography*, 56, 189-222, 2003.
- 730 Sabine, C., Key, R. M., Kozyr, A., Feely, R. A., Wanninkhof, R., Millero, F. J., Peng, T.-H., Bullister, J. L., and Lee, K.: Global Ocean Data Analysis Project (GLODAP): Results and Data, ORNL/CDIAC-145, NDP-083, Carbon Dioxide Information Analysis Center, Oak Ridge National Laboratory, U. S. Department of Energy, Oak Ridge, Tennessee, 2005.
- Sarmiento, J.L., and Gruber, N.: *Biochemical dynamics of ocean*. Princetown University Press, 173-197, 2006.
- Sprattall, J. and Tomczak, T.: On the formation of Central Water and thermocline ventilation in the southern hemisphere Deep
- 735 Sea Research, 1, 40, No 4, pp 827-844, 1993.
- Sokolov, S., and Rintoul, S.: Circulation and water masses of the southwest Pacific: WOCE Section P11, Papua New Guinea to Tasmania, *Journal of Marine Research*, 58, 223-268, 2000.
- Stramma, L., Peterson, R. G., and Tomczak, T.: The South Pacific Current, *Journal of Physical Oceanography*, 25, 77-91, 1995.
- 740 Suzuki, T., Ishii, M., Aoyama, A., Christian, J. R., Enyo, K., Kawano, T., Key, R. M., Kosugi, N., Kozyr, A., Miller, L. A., Murata, A., Nakano, T., Ono, T., Saino, T., Sasaki, K., Sasano, D., Takatani, Y., Wakita, M., and Sabine, C. L.: PACIFICA Data Synthesis Project, ORNL/CDIAC-159, NDP-092, Carbon Dioxide Information Analysis Center, Oak Ridge National Laboratory, U. S. Department of Energy, Oak Ridge, Tennessee, 2013.
- Takahashi, T., Broecker, V. S. and Langer, S.: Redfield ratio based on chemical data from isopycnal surfaces, *J. Geophys. Res.*, 90, 6907-6924, 1985.
- 745 Talley, L.D., Pickard, G.L., Emery, W.J. and Swift, J.H.: *Descriptive Physical Oceanography*, Elsevier Press, 333-362, 2011.
- Tanhua, T., Olsen, A., Hoppema, M., Jutterström, S., Schirnack, C., van Heuven, S., Velo, A., Lin, X., Kozyr, A., Alvarez, M., Bakker, D.C.E., Brown, P., Falck, E., Jeansson, E., Lo Monaco, C., Olafsson, J., Perez, F.F., Pierrot, D., Rios, A. F., Sabine, C.L., Schuster, U., Steinfeldt, R., Stendardo, I., Andeson, L.G., Bates, N.R., Bellerby, R. G.J., Blindheim, J., Bullister, J.L.,
- 750 Gruber, N., Ishii, M., Johannessen, T., Jones, E.P., Köhler, J., Körtzinger, A., Metzl, N., Murata, A., Musielewicz, S., Omar, A.M., Olsson, K.A., de la Paz, M., Pfeil, B., Rey, F., Rhein, M., Skjelvan, I., Tilbrook, B., Wanninkhof, R., Mintrop, L., Wallace, D.W.R., and Key, R.M.: CARINA Data Synthesis Project, ORNL/CDIAC-157, NDP-091, Carbon Dioxide Information Analysis Center, Oak Ridge National Laboratory, U. S. Department of Energy, Oak Ridge, Tennessee, 2009.
- Tomczak, M., and Hao, D.: Water masses in the thermocline of the Coral Sea, *Deep Sea Research*, 10, 1503-1514, 1989.
- 755 Wagener, T., Guieu, C., Losno, R., Bonnet, S., and Mahowald, N.: Revisiting atmospheric dust export to the Southern Hemisphere ocean: Biogeochemical implications, *Global Biogeochemical Cycles*, 22, 2, 2008.
- Webb, D.J.: Evidence for Shallow Zonal Jets in the South Equatorial Current Region of the Southwest Pacific, *Journal of Physical Oceanography*, 30, 706-720, 2000.
- Wijffels, S.E., Toole, J.M., and Davis, R.: Revisiting the South Pacific subtropical circulation: A synthesis of the World Ocean
- 760 Circulation Experiment observations along 32° S, *Journal of Geophysical research*, 106, 481-513, 2001.
- Williams P.J. leB. and Jenkinson.: A transportable microprocessor-controlled precise Winkler titration suitable for field station and shipboard use, *Limnology and Oceanography*. 27, 576-585, 1982.
- Winkler, L.W.: Die Bestimmung des in Wasser gelosten Sauerstoffes. *Berichte der Deutschen Chemischen Gesellschaft*, 21, 2842-2855, 1888.
- 765 Wood, E.D., Armstrong, F.A.J., and Richards, F.A.: Determination of nitrate in the sea water by cadmium copper reduction to nitrite, *Journal of Marine Biology*, 47, 23-31, 1967.
- Yoshikawa, C., Makabe, A., Shiozaki, T., Toyoda, S., Yoshida, O., Furuya, K., and Yoshida, N.: Nitrogen isotope ratios of nitrate and N\* anomalies in the subtropical South Pacific, *Geochemistry Geophysics, Geosystem*, 16, 1439-1448, 2015.
- Wyrtki, K.: The subsurface water masses in the western South Pacific Ocean, *Aust. J. Mar. Freshwater Res.*, 13, 18-47, 1962a.



770 Wyrski, K.: El Nino--the dynamic response of the equatorial Pacific Ocean to atmospheric forcing, Journal of Physical  
Oceanography, 5,572-584, 1975.

775

780

785

790

795

800

805





Table 1. Mean values, standard deviations (sd), and minimum and maximum values observed for all parameter in surface waters ( $\sigma_{21.7}$ - $\sigma_{23.5}$ ).

|                                                              |                                      | MA                                       |       |        |        | GY    |       |        |        |
|--------------------------------------------------------------|--------------------------------------|------------------------------------------|-------|--------|--------|-------|-------|--------|--------|
|                                                              |                                      | mean                                     | sd    | [min   | max]   | mean  | std   | [min   | max]   |
|                                                              |                                      | SW [ $\sigma_{21.7}$ - $\sigma_{23.5}$ ] |       |        |        |       |       |        |        |
| N <sub>2</sub> fixation                                      | nmol L <sup>-1</sup> d <sup>-1</sup> | 12.38                                    | 9.80  | [1.41  | 42.25] | 0.75  | 0.90  | [0.01  | 2.29]  |
| Depth                                                        | dbar                                 | 23.68                                    | 16.46 | [4.12  | 71.30] | 28.37 | 17.49 | [5.12  | 57.89] |
| PO <sub>4</sub> <sup>3-</sup>                                | μmol L <sup>-1</sup>                 | 0.08                                     | 0.03  | [0.05  | 0.17]  | 0.15  | 0.02  | [0.11  | 0.17]  |
| NO <sub>3</sub> <sup>-</sup>                                 | μmol L <sup>-1</sup>                 | < QL                                     | < QL  | < QL   |        | < QL  | < QL  | < QL   |        |
| NO <sub>3</sub> <sup>-</sup> : PO <sub>4</sub> <sup>3-</sup> | /                                    | < QL                                     | < QL  | < QL   |        | < QL  | < QL  | < QL   |        |
| N*                                                           | μmol L <sup>-1</sup>                 | < QL                                     | < QL  | < QL   |        | < QL  | < QL  | < QL   |        |
| POP                                                          | μmol L <sup>-1</sup>                 | 0.029                                    | 0.007 | [0.016 | 0.057] | 0.014 | 0.003 | [0.011 | 0.019] |
| PON                                                          | μmol L <sup>-1</sup>                 | 0.549                                    | 0.183 | [0.271 | 1.175] | 0.209 | 0.036 | [0.166 | 0.315] |
| PON : POP                                                    | /                                    | 18.50                                    | 2.44  | [14.56 | 25.32] | 15.58 | 1.57  | [12.59 | 20.15] |
| DON                                                          | μmol L <sup>-1</sup>                 | 5.49                                     | 0.44  | [4.77  | 6.81]  | 5.13  | 0.46  | [4.74  | 6.39]  |
| DOP                                                          | μmol L <sup>-1</sup>                 | 0.16                                     | 0.03  | [0.10  | 0.30]  | 0.19  | 0.03  | [0.16  | 0.23]  |
| DON : DOP                                                    | /                                    | 34.15                                    | 5.96  | [18.70 | 57.70] | 27.83 | 2.72  | [22.48 | 32]    |

810

Table 2. mean values, standard deviations (sd), minimum and maximum values observed for all properties in the waters of the upper thermocline ( $\sigma_{23.5}$ - $\sigma_{25.4}$ ).

|                                                              |                                      | MA                                      |       |        |         | GY     |       |        |         |
|--------------------------------------------------------------|--------------------------------------|-----------------------------------------|-------|--------|---------|--------|-------|--------|---------|
|                                                              |                                      | mean                                    | sd    | [min   | max]    | mean   | std   | [min   | max]    |
|                                                              |                                      | UTW [ $\sigma_{23.5}$ $\sigma_{25.4}$ ] |       |        |         |        |       |        |         |
| N <sub>2</sub> fixation                                      | nmol L <sup>-1</sup> d <sup>-1</sup> | 0.30                                    | 0.49  | [0.01  | 1.73]   | 0.44   | 0.40  | [0.01  | 1.18]   |
| Depth                                                        | dbar                                 | 134.37                                  | 53.01 | [35.42 | 251.52] | 140.85 | 53.79 | [60.73 | 249.17] |
| PO <sub>4</sub> <sup>3-</sup>                                | μmol L <sup>-1</sup>                 | 0.24                                    | 0.11  | [0.05  | 0.63]   | 0.28   | 0.15  | [0.11  | 0.59]   |
| NO <sub>3</sub> <sup>-</sup>                                 | μmol L <sup>-1</sup>                 | 2.35                                    | 1.59  | [0.05  | 7.22]   | 2.19   | 1.90  | [0.05  | 5.72]   |
| NO <sub>3</sub> <sup>-</sup> : PO <sub>4</sub> <sup>3-</sup> | /                                    | 8.09                                    | 3.65  | [0.36  | 13.04]  | 5.49   | 3.62  | [0.36  | 9.77]   |
| N*                                                           | μmol L <sup>-1</sup>                 | 1.11                                    | 0.53  | [-0.12 | 2.13]   | -0.14  | 0.49  | [-1.13 | 0.75]   |
| POP                                                          | μmol L <sup>-1</sup>                 | 0.013                                   | 0.007 | [0.004 | 0.036]  | 0.009  | 0.005 | [0.003 | 0.019]  |
| PON                                                          | μmol L <sup>-1</sup>                 | 0.210                                   | 0.114 | [0.070 | 0.547]  | 0.151  | 0.078 | [0.048 | 0.272]  |
| PON : POP                                                    | /                                    | 16.39                                   | 1.48  | [13.07 | 20.04]  | 16.27  | 1.05  | [14.50 | 18.65]  |
| DON                                                          | μmol L <sup>-1</sup>                 | 4.45                                    | 0.56  | [3.24  | 5.93]   | 4.36   | 0.59  | [3.20  | 5.29]   |
| DOP                                                          | μmol L <sup>-1</sup>                 | 0.09                                    | 0.03  | [0.04  | 0.16]   | 0.12   | 0.05  | [0.03  | 0.21]   |
| DON : DOP                                                    | /                                    | 51.57                                   | 16.98 | [29.85 | 120.25] | 42.74  | 21.25 | [23.05 | 115.00] |

815

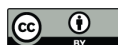

Table 3. mean values, standard deviations (sd), minimum and maximum values observed for all properties in the waters of the lower thermocline ( $\sigma_{25.4}$ - $\sigma_{26.7}$ ).

|                                    |                        | MA                                      |       |         |         | GY     |       |         |         |
|------------------------------------|------------------------|-----------------------------------------|-------|---------|---------|--------|-------|---------|---------|
|                                    |                        | mean                                    | sd    | [min    | max]    | mean   | std   | [min    | max]    |
|                                    |                        | LTW [ $\sigma_{25.4}$ $\sigma_{26.7}$ ] |       |         |         |        |       |         |         |
| Depth                              | dbar                   | 349.04                                  | 80.87 | [249.14 | 501.21] | 339.07 | 60.80 | [249.48 | 402.19] |
| $\text{PO}_4^{3-}$                 | $\mu\text{mol L}^{-1}$ | 0.77                                    | 0.31  | [0.35   | 1.31]   | 0.92   | 0.29  | [0.57   | 1.44]   |
| $\text{NO}_3^-$                    | $\mu\text{mol L}^{-1}$ | 10.07                                   | 4.53  | [4.13   | 18.35]  | 11.33  | 4.46  | [6.42   | 18.69]  |
| $\text{NO}_3^- : \text{PO}_4^{3-}$ | /                      | 12.92                                   | 0.82  | [11.33  | 14.33]  | 12.06  | 1.16  | [10.64  | 14.00]  |
| $\text{N}^*$                       | $\mu\text{mol L}^{-1}$ | 0.75                                    | 0.54  | [-0.49  | 1.52]   | -0.51  | 0.78  | [-1.55  | 0.72]   |
| POP                                | $\mu\text{mol L}^{-1}$ | 0.005                                   | 0.001 | [0.003  | 0.008]  | 0.005  | 0.001 | [0.003  | 0.006]  |
| PON                                | $\mu\text{mol L}^{-1}$ | 0.084                                   | 0.019 | [0.051  | 0.134]  | 0.067  | 0.017 | [0.050  | 0.097]  |
| PON : POP                          | /                      | 16.79                                   | 3.19  | [12.85  | 25.78]  | 14.91  | 0.92  | [13.80  | 15.80]  |
| DON                                | $\mu\text{mol L}^{-1}$ | 3.50                                    | 0.38  | [2.77   | 4.25]   | 3.45   | 0.41  | [2.78   | 4.01]   |
| DOP                                | $\mu\text{mol L}^{-1}$ | 0.06                                    | 0.03  | [0.02   | 0.12]   | 0.04   | 0.02  | [0.02   | 0.08]   |
| DON : DOP                          | /                      | 80.36                                   | 42.37 | [31.75  | 181.50] | 100.85 | 49.18 | [40.75  | 182]    |

820 Table 4. mean values, standard deviations (sd), minimum and maximum values observed for all properties in SAMW / AAIW ( $\sigma_{26.7}$ -  $\sigma_{27.3}$ ).

|                                    |                        | MA                                            |        |         |        | GY     |        |         |         |
|------------------------------------|------------------------|-----------------------------------------------|--------|---------|--------|--------|--------|---------|---------|
|                                    |                        | mean                                          | sd     | [min    | max]   | mean   | std    | [min    | max]    |
|                                    |                        | SAMW/AAIW [ $\sigma_{26.7}$ $\sigma_{27.3}$ ] |        |         |        |        |        |         |         |
| Depth                              | dbar                   | 694.64                                        | 142.85 | [496.91 | 1008]  | 635.82 | 130.69 | [500.75 | 801.29] |
| $\text{PO}_4^{3-}$                 | $\mu\text{mol L}^{-1}$ | 1.88                                          | 0.29   | [1.37   | 2.32]  | 2.03   | 0.25   | [1.67   | 2.35]   |
| $\text{NO}_3^-$                    | $\mu\text{mol L}^{-1}$ | 26.91                                         | 4.32   | [19.62  | 33.81] | 29.16  | 4.17   | [23.60  | 34.26]  |
| $\text{NO}_3^- : \text{PO}_4^{3-}$ | /                      | 14.41                                         | 0.27   | [13.87  | 15.12] | 14.31  | 0.31   | [13.80  | 14.58]  |
| $\text{N}^*$                       | $\mu\text{mol L}^{-1}$ | -0.07                                         | 0.56   | [-1.13  | 1.26]  | -0.47  | 0.35   | [-1.14  | -0.14]  |

825

830

835



## 840 Figures caption

Fig. 1. Conceptual diagram of the different processes influencing the intensity of  $N^*$ .

845 Fig. 2. (a) location of the OUTPACE section superimposed on a bathymetry map of the Western Tropical South Pacific Ocean, (b) map of the South Pacific and location of the OUTPACE section. The red markers correspond to the location of the stations sampled in the MA (SD 1 to LD B) and the blue markers to those sampled in the GY (SD 13 to SD 15). Large-scale ocean currents are represented by black lines (SEC=South Equatorial Current; NVJ=North Vanuatu Jet; NCJ=North Caledonian Jet; EAC=East Australian Current; NQC=North Queensland Current; STCC=South Tropical Counter Current; EAUC= East Auckland Current; SPC=South Pacific Current; PCC= Peru-Chile Current; ACC= Circumpolar Antarctic Current), OMZ= Oxygen Minimum Zone; TKR=Tonga Kermadec Ridge. The synthesis was carried out from the literature,

Fig. 3. Location of the GLODAPv2 section available for the South Pacific. The detail of sections is available in the table S1.

855 Fig. 4. (a)  $\Theta$ -S diagrams for all the 18 deep casts of the OUTPACE cruise, (b) AOU concentration ( $\mu\text{mol kg}^{-1}$ ), (c) vertical profiles of chlorophyll-a concentration ( $\text{mg m}^{-3}$ ), (d)  $N_2$  fixation rates ( $\text{nmol N L}^{-1} \text{d}^{-1}$ ) vs. density ( $\text{kg m}^{-3}$ ), (red marker = MA, blue marker = GY).

Fig. 5. Concentrations ( $\mu\text{mol L}^{-1}$ ) of (a)  $\text{NO}_3^-$ , (b)  $\text{PO}_4^{3-}$ , (c) PON, and (d) POP along the OUTPACE transect (0-500 dbar).

860 Fig. 6. (a) Concentrations of  $\text{NO}_3^-$ , (b)  $\text{PO}_4^{3-}$  ( $\mu\text{mol L}^{-1}$ ) and (c)  $\text{NO}_3^-$ :  $\text{PO}_4^{3-}$  ratio vs. density ( $\text{kg m}^{-3}$ ), (d) concentrations of  $\text{PO}_4^{3-}$  ( $\mu\text{mol L}^{-1}$ ) vs  $\text{NO}_3^-$  ( $\mu\text{mol L}^{-1}$ ), (red marker = MA, blue marker = GY). The dashed black line shows the relationship existing if formation and remineralization of organic matter were the only processes involved and considering RR.

865 Fig. 7. Concentrations of (a) PON ( $\mu\text{mol L}^{-1}$ ), (b) POP ( $\mu\text{mol L}^{-1}$ ) and (c) PON: POP ratio vs. density ( $\text{kg m}^{-3}$ ), (d) concentrations of POP ( $\mu\text{mol L}^{-1}$ ) vs. PON ( $\mu\text{mol L}^{-1}$ ), (red marker = MA, blue marker = GY). The dashed black line shows the relationship existing if formation and remineralization of organic matter were the only processes involved and considering RR.

870 Fig. 8. Excess PON concentration ( $\mu\text{mol L}^{-1}$ ) compared to the value predicted considering the RR (dashed black line), (red marker = MA, blue marker = GY).

Fig. 9. Concentrations of (a) DON ( $\mu\text{mol L}^{-1}$ ), (b) DOP ( $\mu\text{mol L}^{-1}$ ) and (c) DON: DOP ratio vs. density ( $\text{kg m}^{-3}$ ), (red marker = MA, blue marker = GY).

875 Fig. 10. (a)  $N^*$  ( $\mu\text{mol L}^{-1}$ ) vs. pressure (dbar), (b) vs. density ( $\text{kg m}^{-3}$ ), (red marker = MA, blue marker = GY, cross marker =  $N^*_{\text{surf}}$ ).

880 Fig. 11. (a) Integrated  $N_2$  fixation rates ( $\mu\text{mol m}^{-2} \text{d}^{-1}$ ) between the surface and  $\sigma_{23.5}$ ; the stations are numbered at the top of the figure, (red marker = MA, blue marker = GY), (c) longitudinal variations of the mean concentrations ( $\pm$  sd) in  $N^*$  ( $\mu\text{mol kg}^{-1}$ ) on the isopycnets 24.7 (green line), 26.5 (gray line) measured on the OUTPACE section.

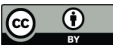

Fig. 12. Map of  $N^*$  ( $\mu\text{mol kg}^{-1}$ ) in the thermocline (a) on isopycnal surfaces 24.7, (b) on isopycnal surface 26.3. Data from GLODAPv2 database (Table S1) and from OUTPACE. The depth of isopycnal surfaces 24.7 and 26.3 are shown in the figures S1. Continuous black lines represent major large-scale currents in the South Pacific (details are available in figure 2).

885

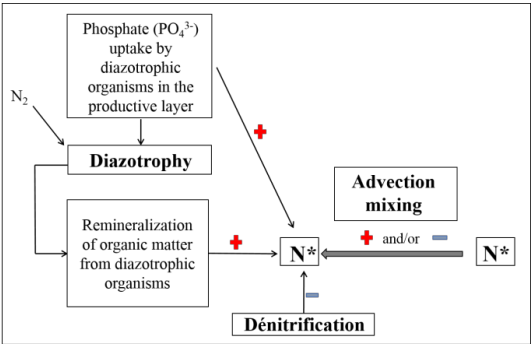

Figure 1

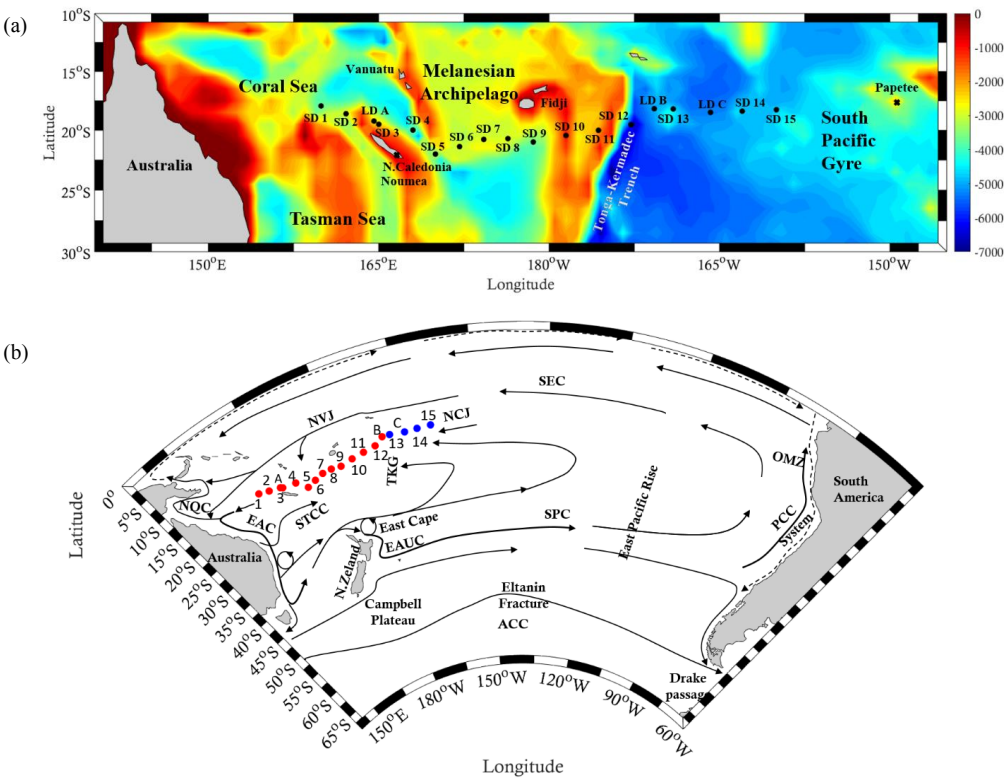

Figure 2. a.b

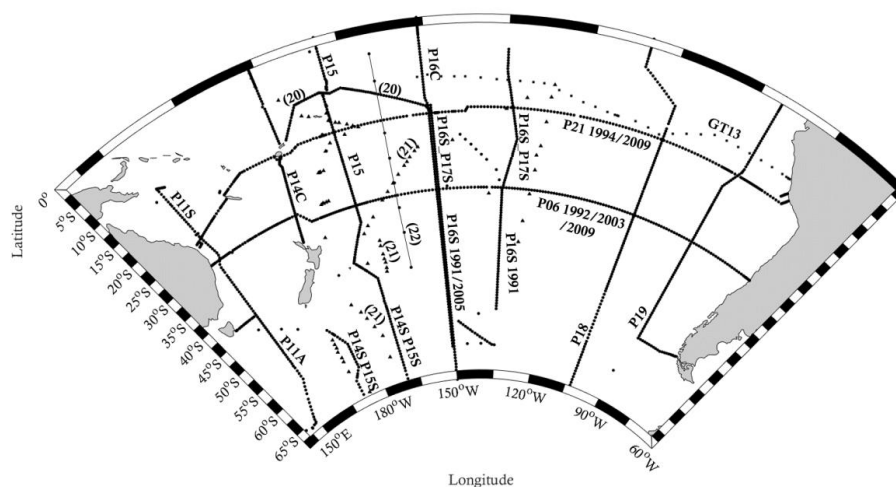

895 **Figure 3**

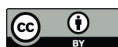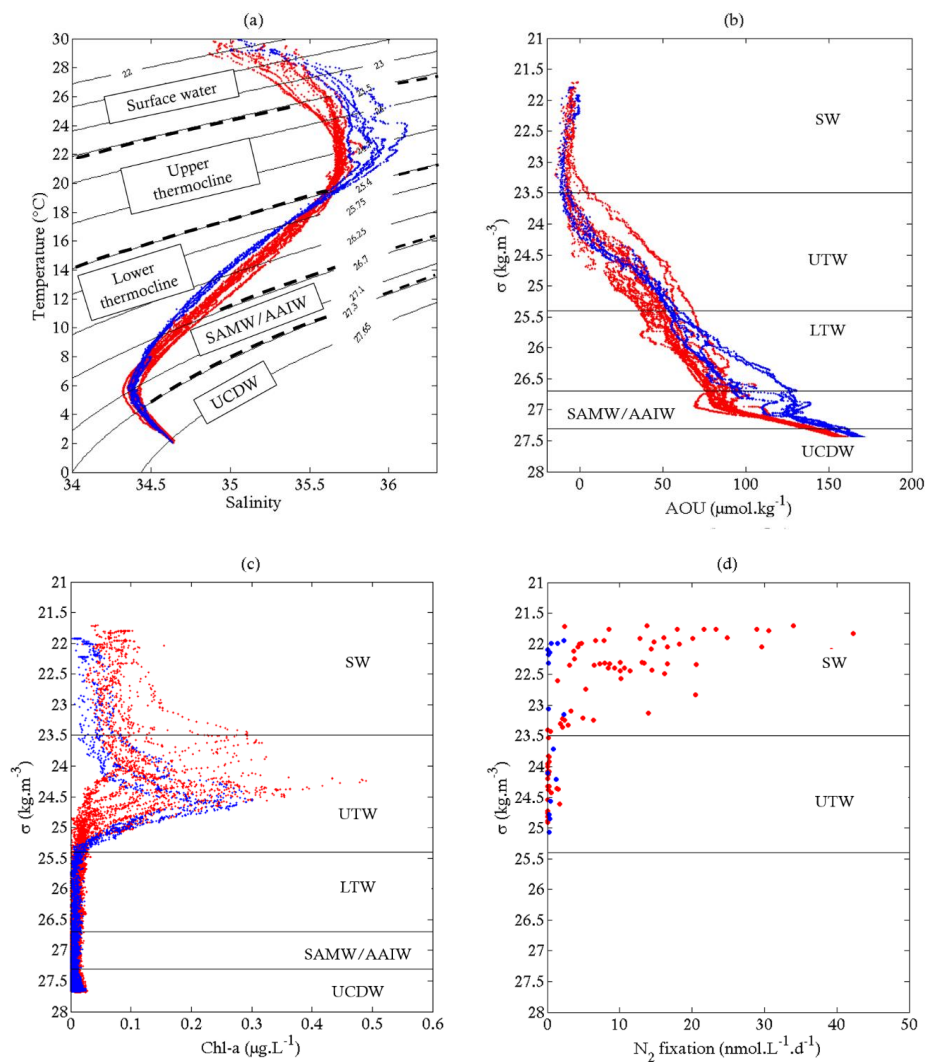

Figure 4. a.b.c.d

900



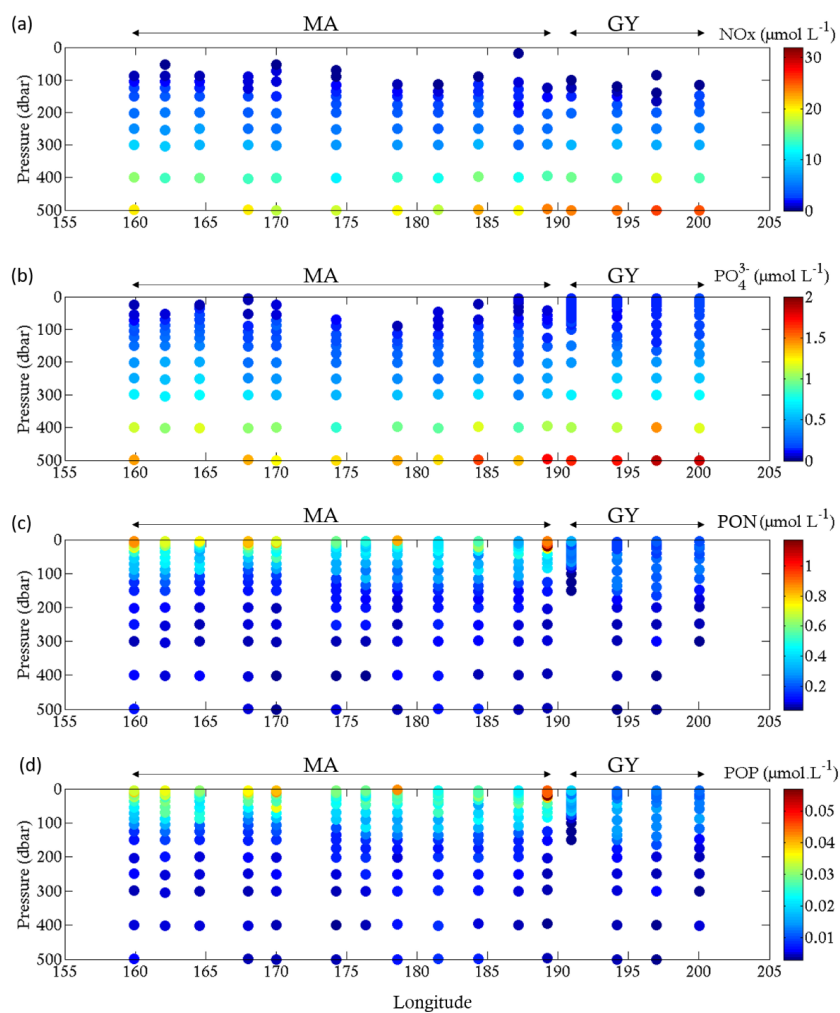

Figure 5. a.b.c.d.

905

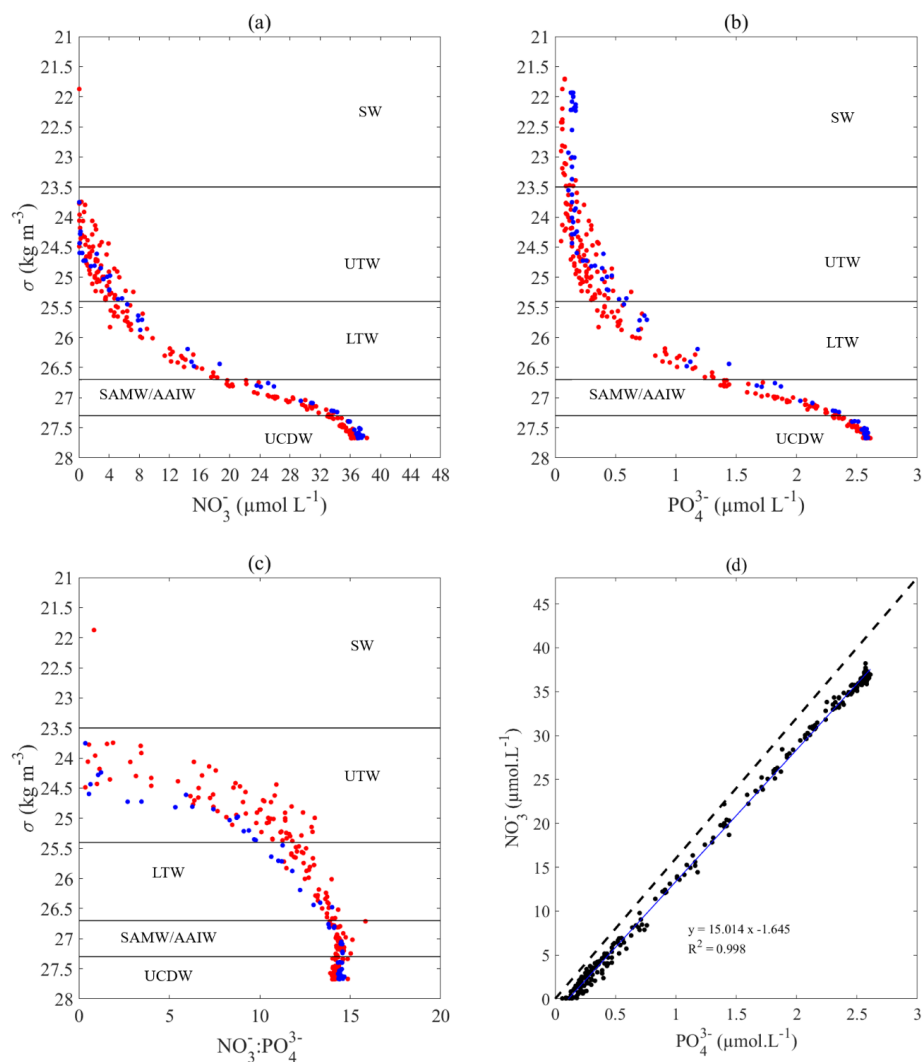

910 Figure 6. a.b.c.d.

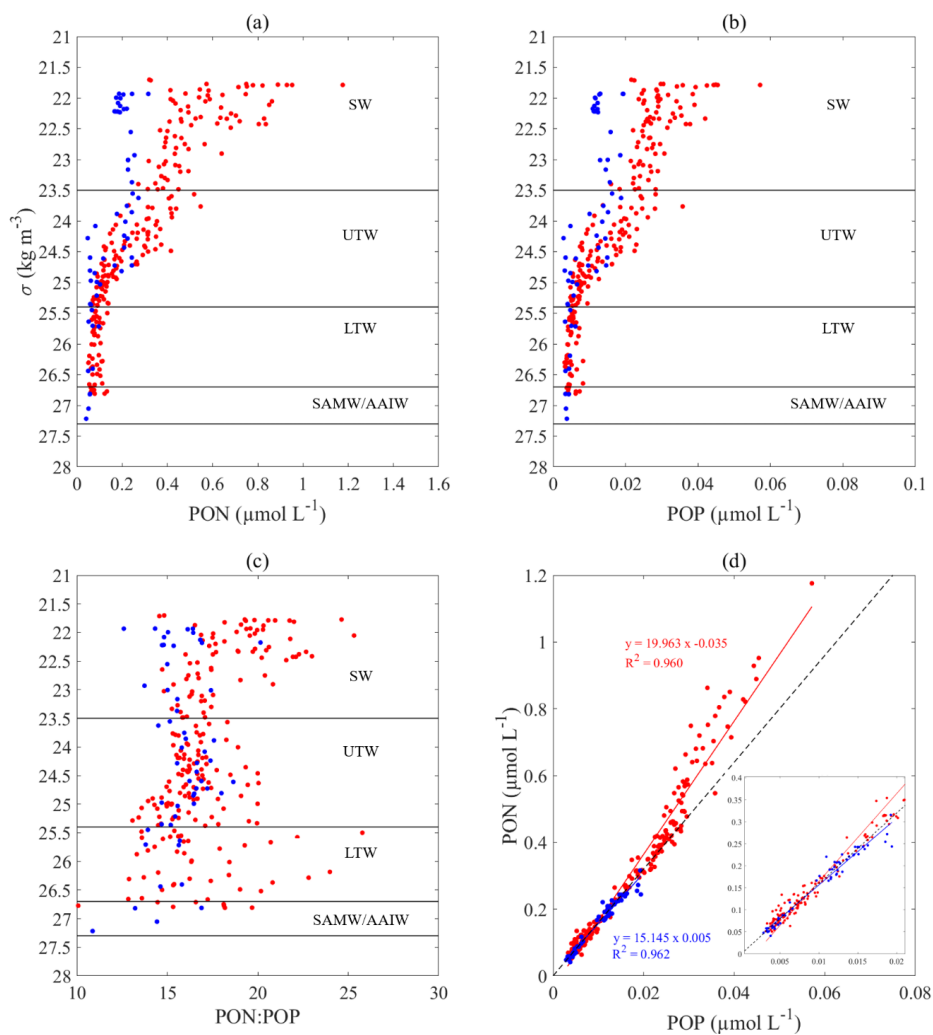

915 **Figure 7. a.b.c.d.**

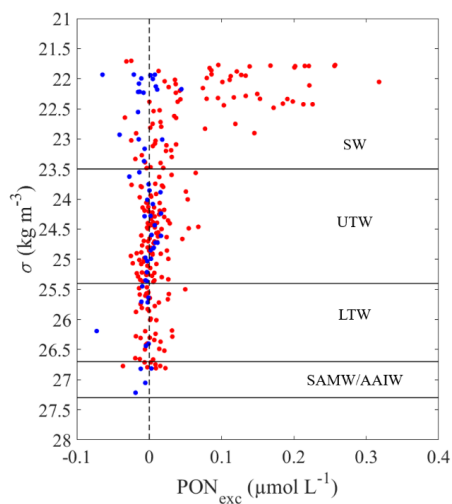

**Figure 8**



920

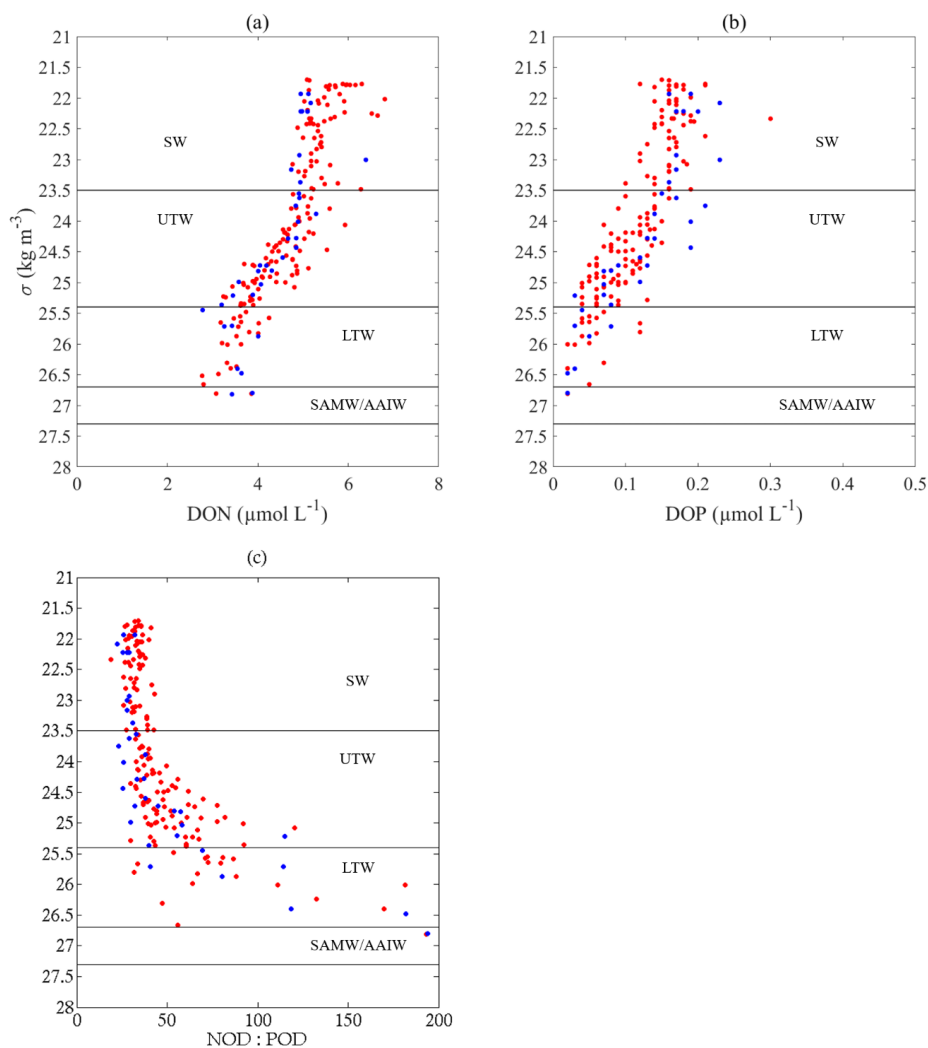

Figure 9. a.b.c.

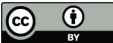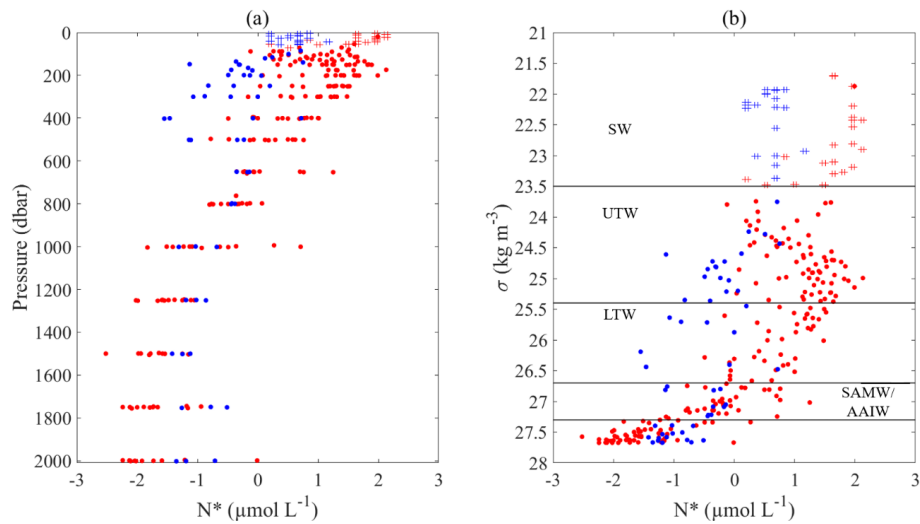

925 **Figure 10. a.b.**

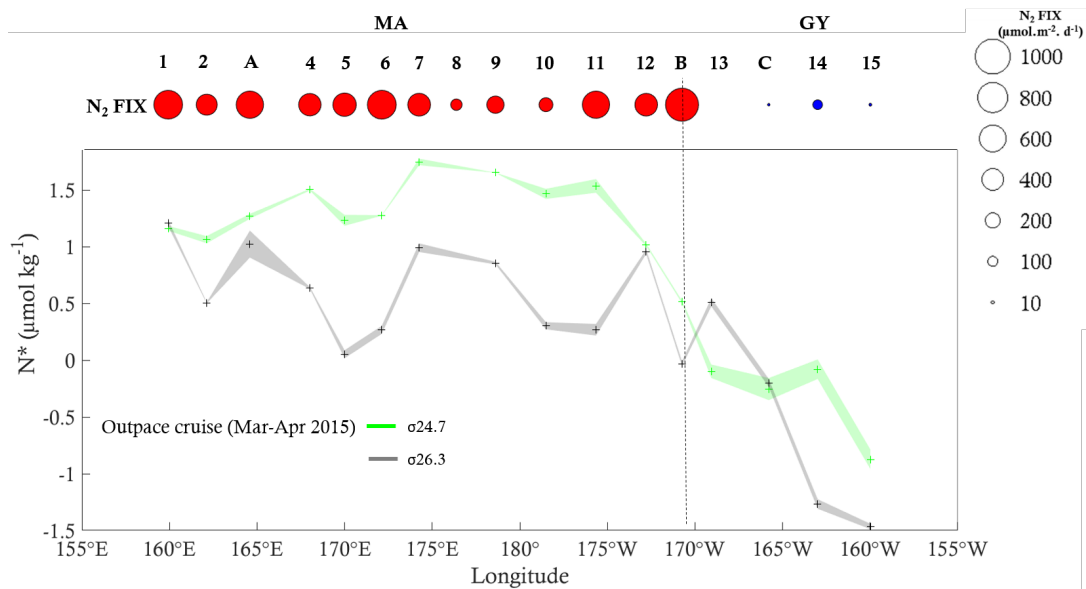

**Figure 11**

930



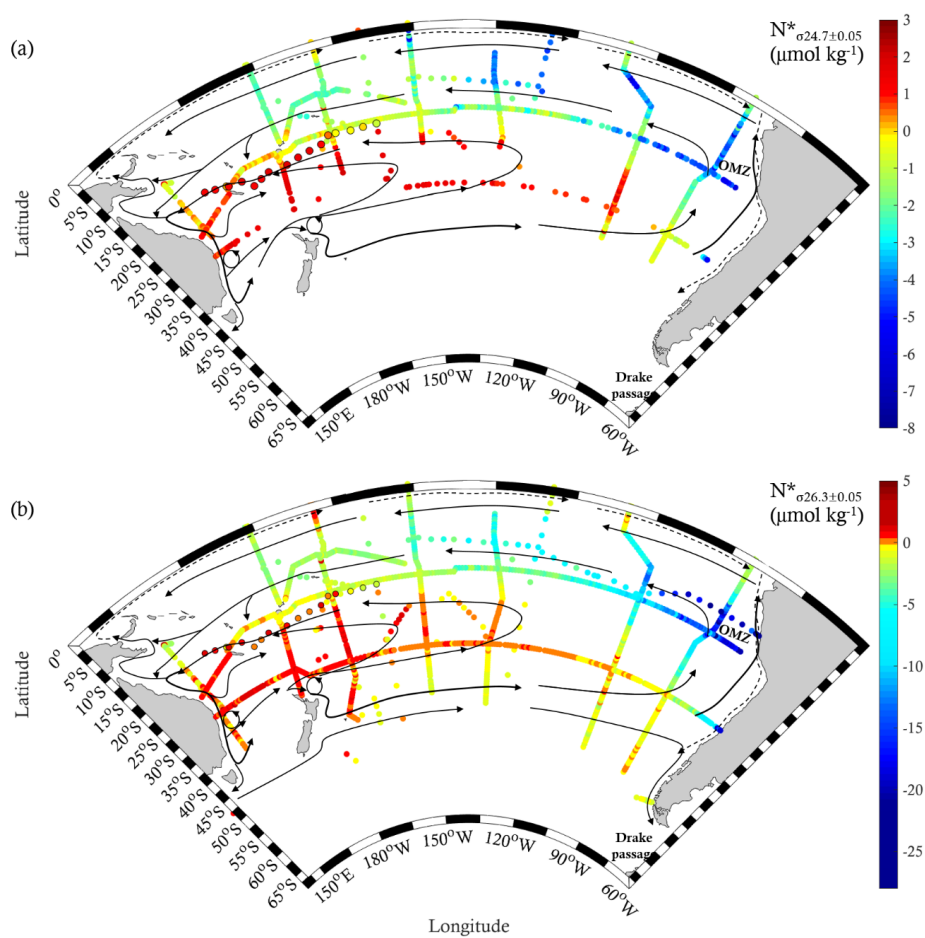

Figure 12. a.b.
